# Supplementary material for: Iridium porphyrin complexes with μ-nitrido, hydroxo, hydrosulfido and alkynyl ligands
Source: Royal Society of Chemistry journal article supplement (doi:10.1039/c9dt00244h), 2019-01-01
Supplement: c9dt00244h1.pdf [file c9dt00244h1.pdf]

Supplementary Information for

Iridium Porphyrin Complexes with  $\mu$ -Nitrido, Hydroxo, Hydrosulfido and  
Alkynyl Ligands

Shiu-Chun So, Wai-Man Cheung\*, Wai-Hang Chiu, Matthew de Vere-Tucker, Herman H. Y.  
Sung, Ian D. Williams\*, and Wa-Hung Leung\*

*Department of Chemistry, The Hong Kong University of Science and Technology,  
Clear Water Bay, Kowloon, Hong Kong, People's Republic of China*

\*Corresponding authors, E-mail: [cheungwm@ust.hk](mailto:cheungwm@ust.hk), [chleung@ust.hk](mailto:chleung@ust.hk)

**Table of Content**

|                                                                                                          | Page no. |
|----------------------------------------------------------------------------------------------------------|----------|
| 1. Crystallographic data and experimental details for <b>3, 4, 7, 8, 9</b> and <b>10</b>                 | 2        |
| 2. NMR spectra                                                                                           | 3-22     |
| 3. Preliminary molecular structure of [Ir(tpp)(PPh <sub>3</sub> )(H <sub>2</sub> O)](SbCl <sub>6</sub> ) | 23       |
| 4. UV/vis spectra                                                                                        | 24-27    |
| 5. Cyclic voltammograms                                                                                  | 28-30    |

Table S1. Crystallographic data and experimental details for **3**, **4**, **7**, **8**, **9** and **10**.

|                                                                                                       | <b>3</b> ·C <sub>6</sub> H <sub>14</sub>                                                               | <b>4</b> ·CH <sub>2</sub> Cl <sub>2</sub>                                                              | <b>7</b> ·0.5C <sub>4</sub> H <sub>8</sub> O·0.5H <sub>2</sub> O                              | <b>8</b> ·0.825C <sub>4</sub> H <sub>10</sub> O                             | <b>9</b> ·0.75C <sub>4</sub> H <sub>8</sub> O                        | <b>10</b>                                           |
|-------------------------------------------------------------------------------------------------------|--------------------------------------------------------------------------------------------------------|--------------------------------------------------------------------------------------------------------|-----------------------------------------------------------------------------------------------|-----------------------------------------------------------------------------|----------------------------------------------------------------------|-----------------------------------------------------|
| Formula                                                                                               | C <sub>75</sub> H <sub>90</sub> Cl <sub>2</sub> CoIrN <sub>5</sub> O <sub>9</sub> P <sub>3</sub><br>Ru | C <sub>62</sub> H <sub>65</sub> Cl <sub>5</sub> CoIrN <sub>5</sub> O <sub>9</sub> P <sub>3</sub><br>Ru | C <sub>128</sub> H <sub>98</sub> Ir <sub>2</sub> N <sub>8</sub> O <sub>4</sub> P <sub>2</sub> | C <sub>73.3</sub> H <sub>56.25</sub> CuIrN <sub>4</sub> O <sub>0.82</sub> P | C <sub>73</sub> H <sub>54</sub> IrN <sub>4</sub> O <sub>0.75</sub> P | C <sub>62</sub> H <sub>44</sub> IrN <sub>4</sub> PS |
| Formula weight                                                                                        | 1721.52                                                                                                | 1646.55                                                                                                | 2258.48                                                                                       | 1419.88                                                                     | 1222.37                                                              | 1100.24                                             |
| Crystal system                                                                                        | Triclinic                                                                                              | monoclinic                                                                                             | orthorhombic                                                                                  | monoclinic                                                                  | orthorhombic                                                         | triclinic                                           |
| Space group                                                                                           | P-1                                                                                                    | P2 <sub>1</sub> /n                                                                                     | Pca2 <sub>1</sub>                                                                             | Pc                                                                          | Pbca                                                                 | P-1                                                 |
| <i>a</i> , Å                                                                                          | 13.0825(3)                                                                                             | 13.4813(2)                                                                                             | 26.2427(2)                                                                                    | 50.7613(8)                                                                  | 19.8221(4)                                                           | 10.0055(4)                                          |
| <i>b</i> , Å                                                                                          | 13.8500(5)                                                                                             | 29.6101(6)                                                                                             | 10.41332(13)                                                                                  | 11.4855(2)                                                                  | 21.8692(4)                                                           | 14.3928(6)                                          |
| <i>c</i> , Å                                                                                          | 20.4656(5)                                                                                             | 16.4218(2)                                                                                             | 35.1224(3)                                                                                    | 20.6642(3)                                                                  | 25.5085(5)                                                           | 17.7170(7)                                          |
| <i>α</i> , deg                                                                                        | 85.316(2)                                                                                              | 90.00                                                                                                  | 90                                                                                            | 90                                                                          | 90                                                                   | 97.827(3)                                           |
| <i>β</i> , deg                                                                                        | 80.0763(19)                                                                                            | 101.0227(15)                                                                                           | 90                                                                                            | 90.0435(13)                                                                 | 90                                                                   | 98.001(3)                                           |
| <i>γ</i> , deg                                                                                        | 78.870(2)                                                                                              | 90.00                                                                                                  | 90                                                                                            | 90                                                                          | 90                                                                   | 107.838(4)                                          |
| <i>V</i> , Å <sup>3</sup>                                                                             | 3579.55(17)                                                                                            | 6434.3(2)                                                                                              | 9598.03(17)                                                                                   | 12047.6(3)                                                                  | 11057.7(4)                                                           | 2361.41(17)                                         |
| <i>Z</i>                                                                                              | 2                                                                                                      | 4                                                                                                      | 4                                                                                             | 8                                                                           | 8                                                                    | 2                                                   |
| <i>ρ</i> <sub>calc</sub> , g cm <sup>-3</sup>                                                         | 1.597                                                                                                  | 1.700                                                                                                  | 1.563                                                                                         | 1.566                                                                       | 1.469                                                                | 1.547                                               |
| <i>T</i> , K                                                                                          | 99.9(4)                                                                                                | 99.9(5)                                                                                                | 100.10(10)                                                                                    | 100.15                                                                      | 100.01(10)                                                           | 100.00(10)                                          |
| <i>μ</i> , mm <sup>-1</sup>                                                                           | 8.818                                                                                                  | 10.901                                                                                                 | 6.115                                                                                         | 3.148                                                                       | 2.495                                                                | 6.568                                               |
| <i>F</i> (000)                                                                                        | 1748.0                                                                                                 | 3288.0                                                                                                 | 4552.0                                                                                        | 5637.0                                                                      | 4944.0                                                               | 1104.0                                              |
| Total reflections                                                                                     | 20356                                                                                                  | 28639                                                                                                  | 30575                                                                                         | 66719                                                                       | 62021                                                                | 13649                                               |
| Independent reflections                                                                               | 12629                                                                                                  | 11287                                                                                                  | 14064                                                                                         | 40951                                                                       | 10817                                                                | 8385                                                |
| <i>R</i> <sub>int</sub>                                                                               | 0.0216                                                                                                 | 0.0441                                                                                                 | 0.0284                                                                                        | 0.0419                                                                      | 0.1519                                                               | 0.0269                                              |
| GoF <sup>a</sup>                                                                                      | 1.012                                                                                                  | 1.003                                                                                                  | 1.002                                                                                         | 1.089                                                                       | 1.001                                                                | 1.001                                               |
| <i>R</i> <sub>1</sub> , <sup>b</sup> <i>wR</i> <sub>2</sub> <sup>c</sup> [ <i>I</i> > 2σ( <i>I</i> )] | 0.0291, 0.0763                                                                                         | 0.0414, 0.1020                                                                                         | 0.0267, 0.0655                                                                                | 0.0755, 0.1747                                                              | 0.0514, 0.1033                                                       | 0.0246,                                             |
| <i>R</i> <sub>1</sub> , <i>wR</i> <sub>2</sub> (all data)                                             | 0.0312, 0.0777                                                                                         | 0.0519, 0.1076                                                                                         | 0.0282, 0.0665                                                                                | 0.0923, 0.1876                                                              | 0.0931, 0.1186                                                       | 0.0285,                                             |

<sup>a</sup> GoF = [Σw(|*F*<sub>o</sub>| - |*F*<sub>c</sub>|)<sup>2</sup>/(*N*<sub>obs</sub> - *N*<sub>param</sub>)]<sup>1/2</sup>. <sup>b</sup> *R*<sub>1</sub> = Σ||*F*<sub>o</sub>| - |*F*<sub>c</sub>||/Σ|*F*<sub>o</sub>|. <sup>c</sup> *wR*<sub>2</sub> [(Σw|*F*<sub>o</sub>| - |*F*<sub>c</sub>|)<sup>2</sup>/Σw<sup>2</sup>|*F*

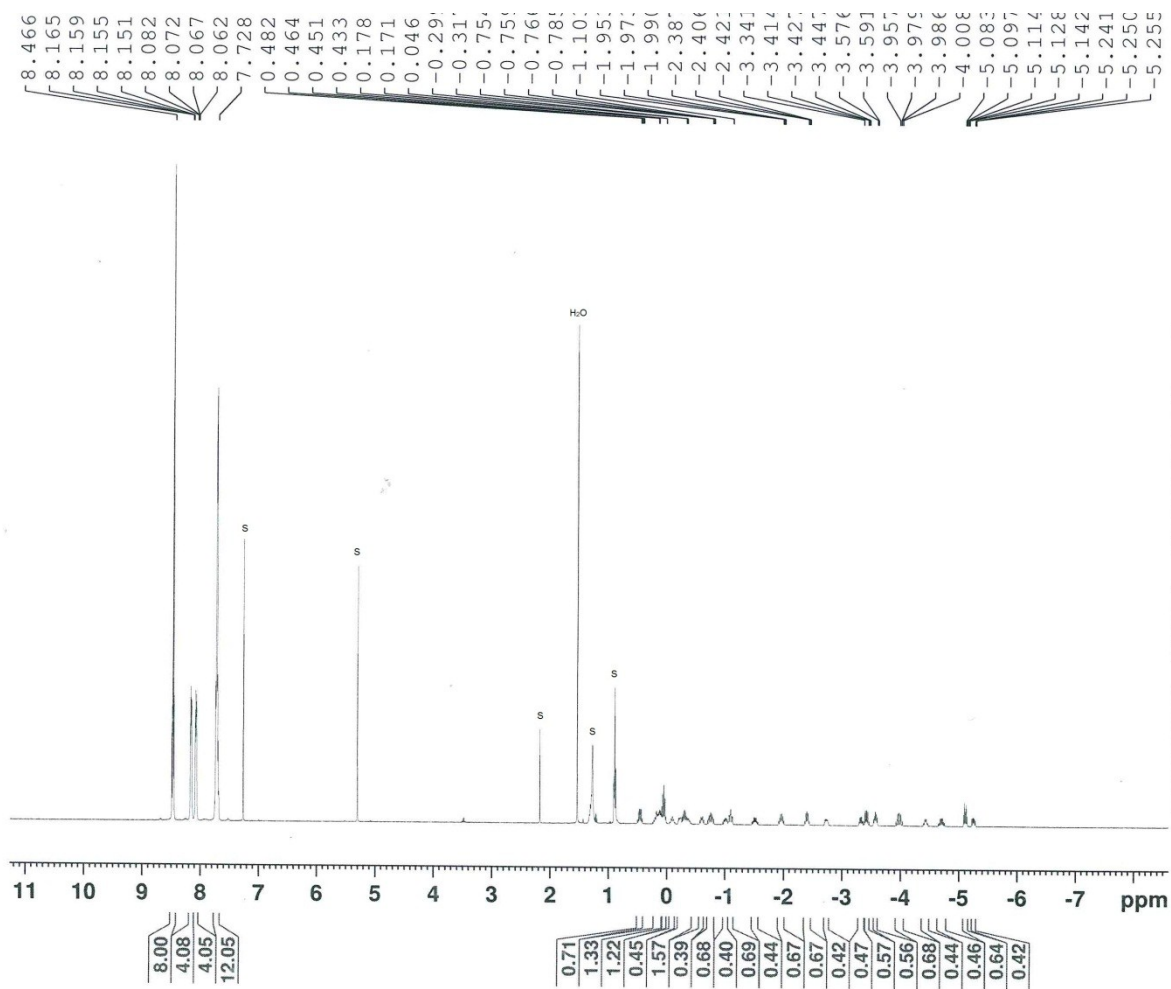

Figure S1.  $^1\text{H}$  NMR (400 MHz, 298 K,  $\text{CDCl}_3$ ) spectrum of **1** (X = impurity, S = residual solvent).

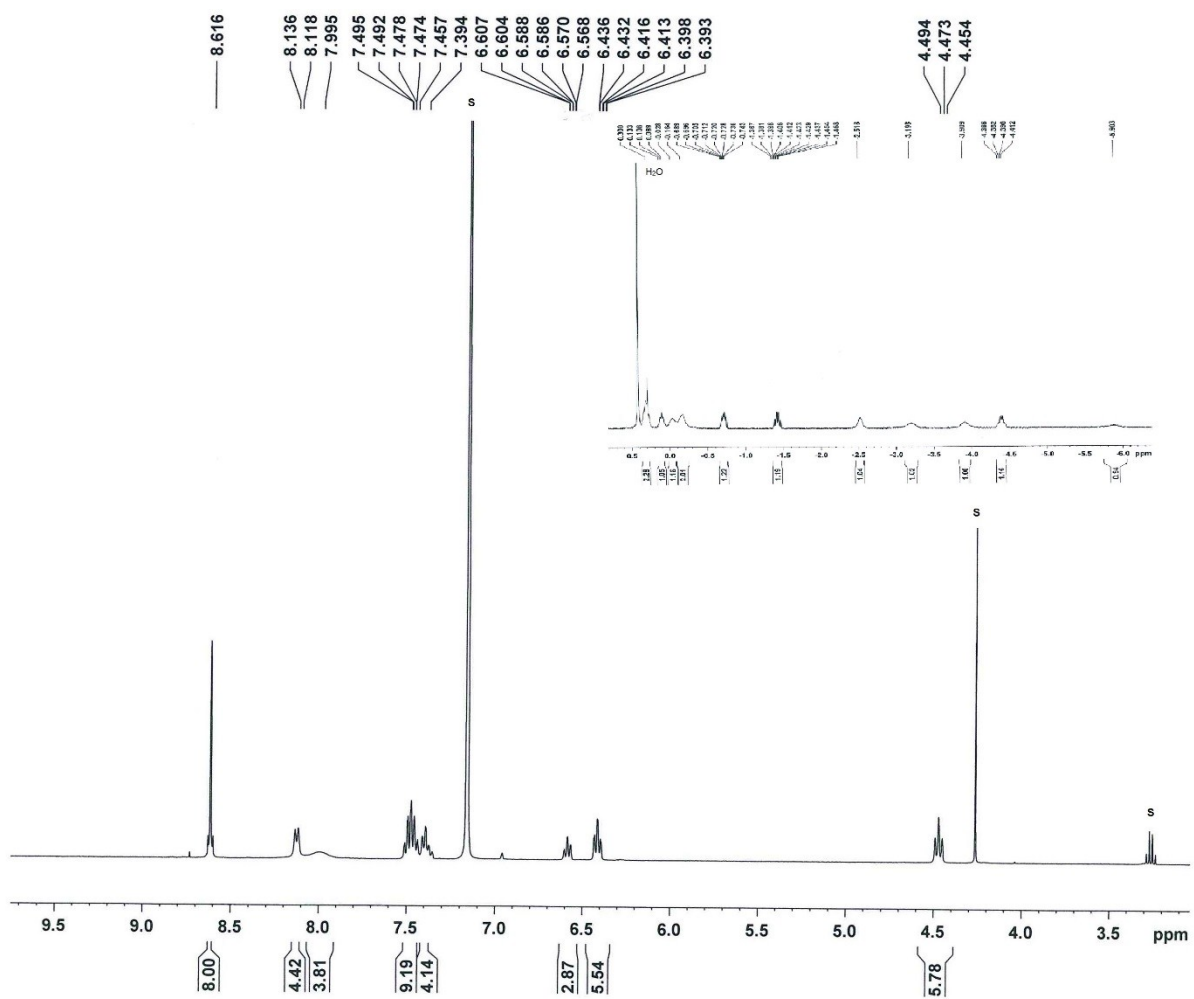

Figure S2. <sup>1</sup>H NMR (400 MHz, 298 K, C<sub>6</sub>D<sub>6</sub>) spectrum of **2** (X = impurity, S = residual solvent).

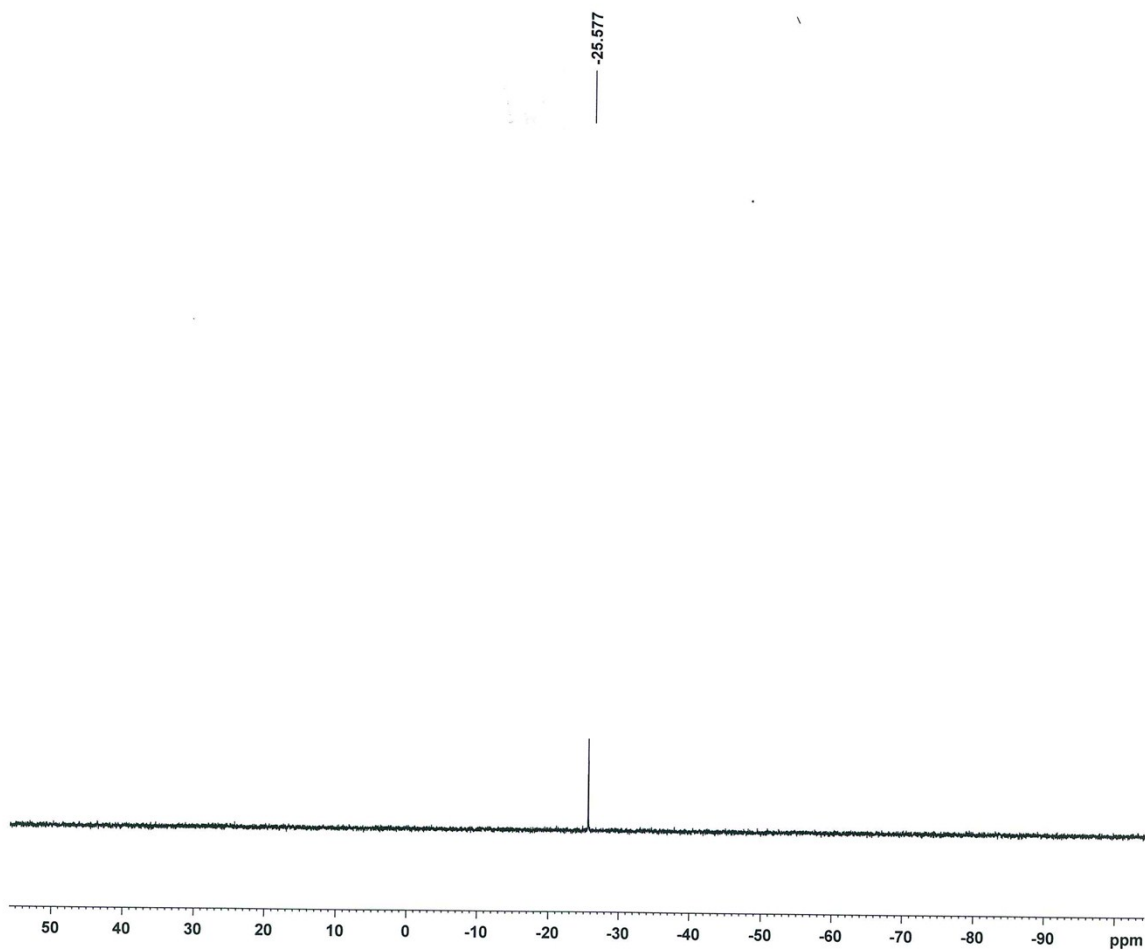

Figure S3.  $^{31}\text{P}\{^1\text{H}\}$  NMR (162 MHz, 298 K,  $\text{C}_6\text{D}_6$ ) spectrum of **2**.

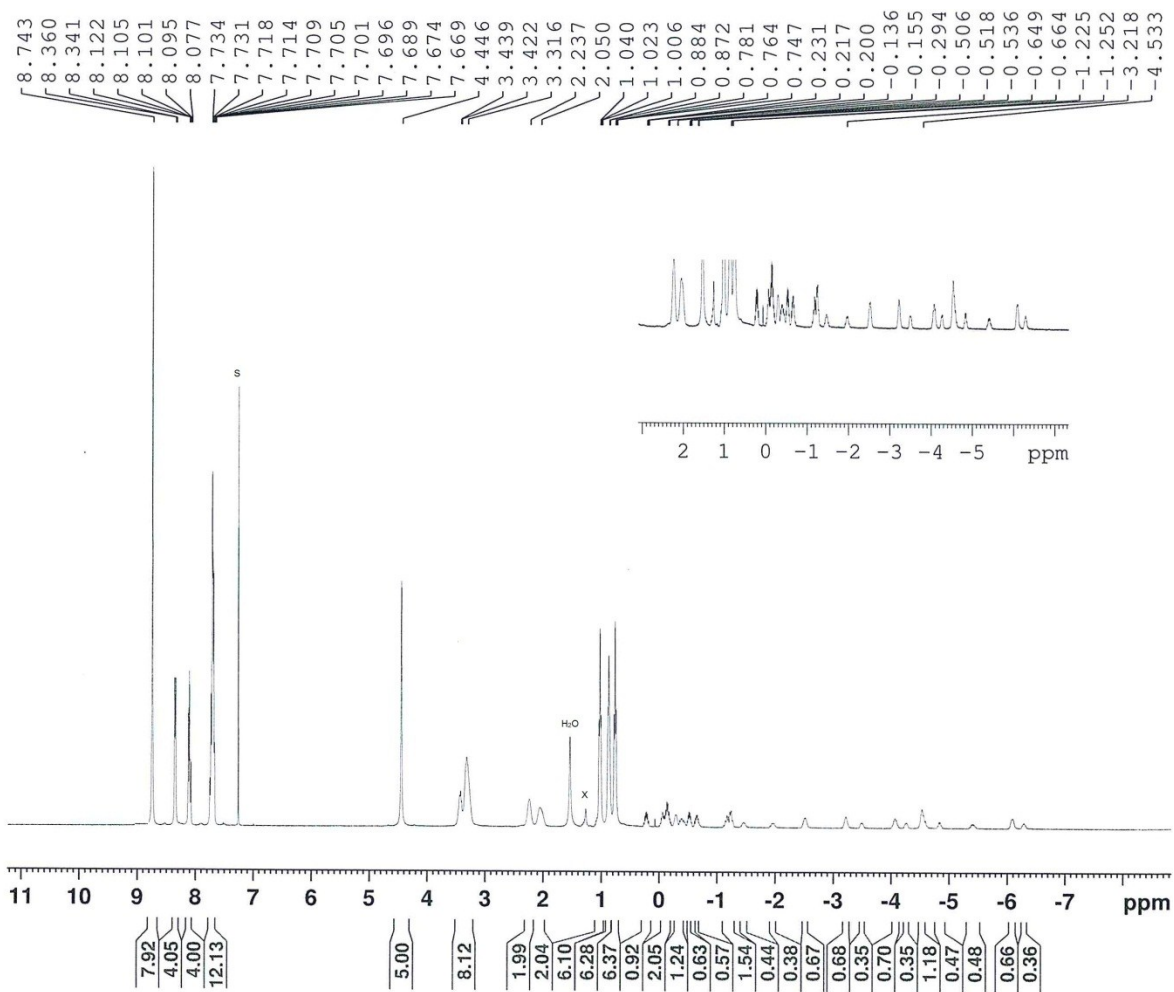

Figure S4.  $^1\text{H}$  NMR (400 MHz, 298 K,  $\text{CDCl}_3$ ) spectrum of **3** (X = impurity, S = residual solvent).

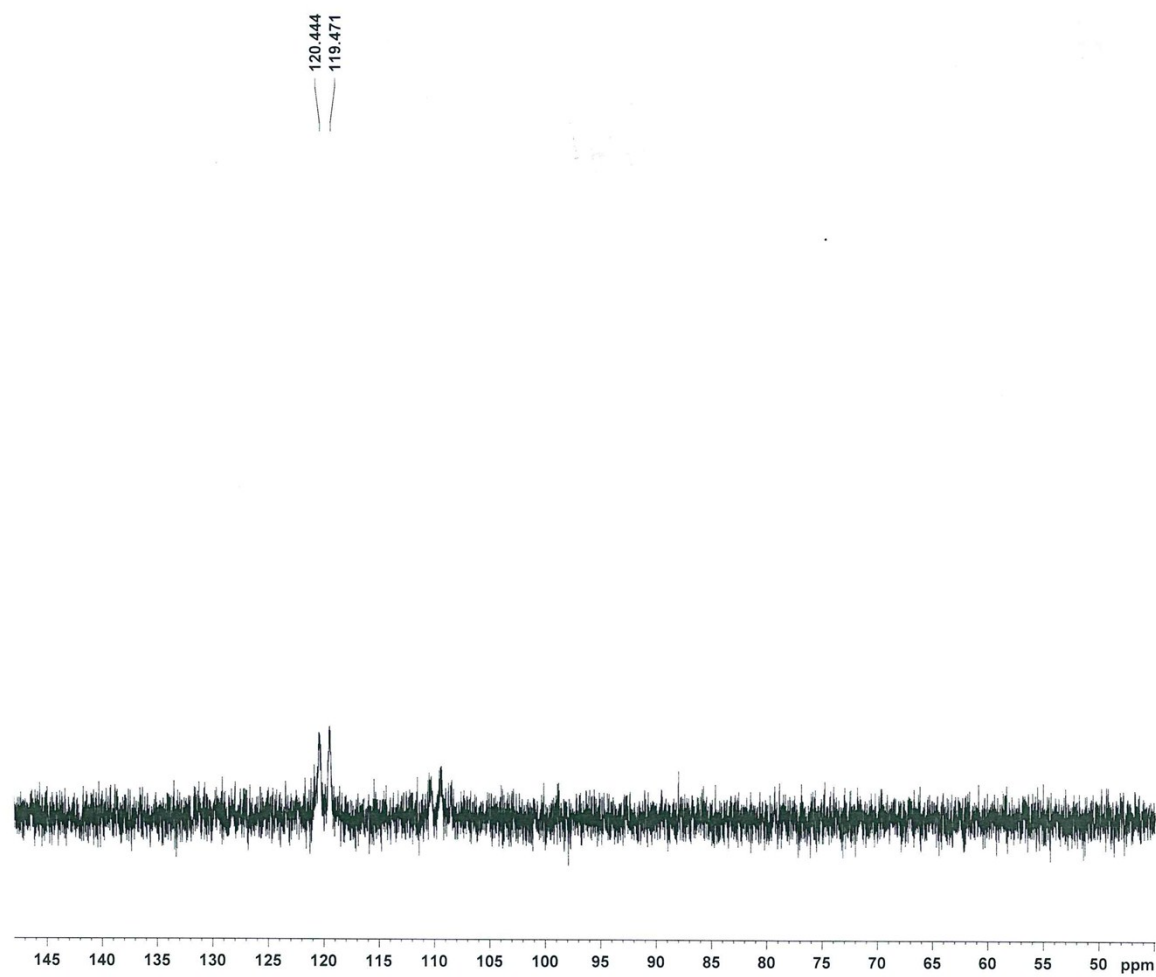

Figure S5.  $^{31}\text{P}\{^1\text{H}\}$  NMR (162 MHz, 298 K,  $\text{CDCl}_3$ ) spectrum of **3**.

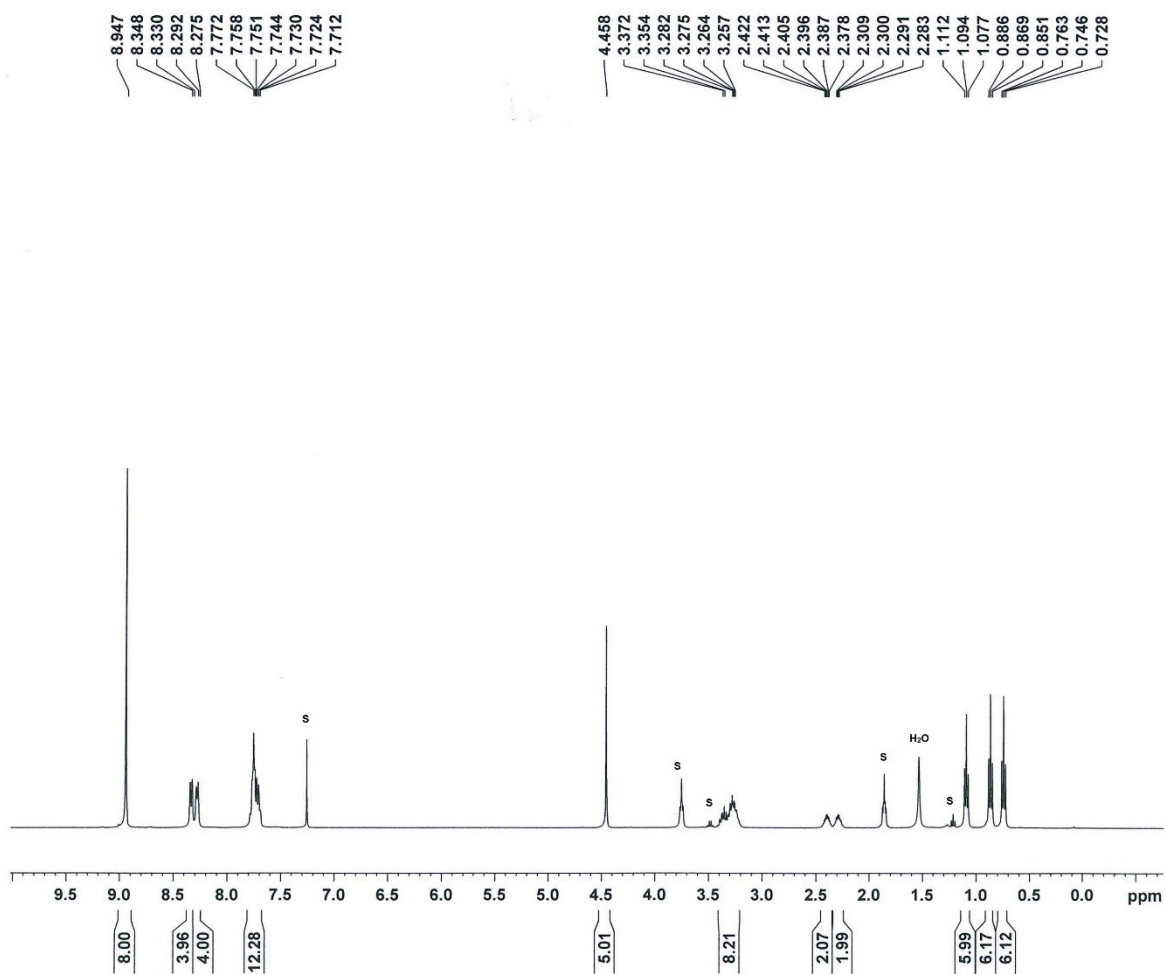

Figure S6. <sup>1</sup>H NMR (400 MHz, 298 K, CDCl<sub>3</sub>) spectrum of **4** (X = impurity, S = residual solvent).



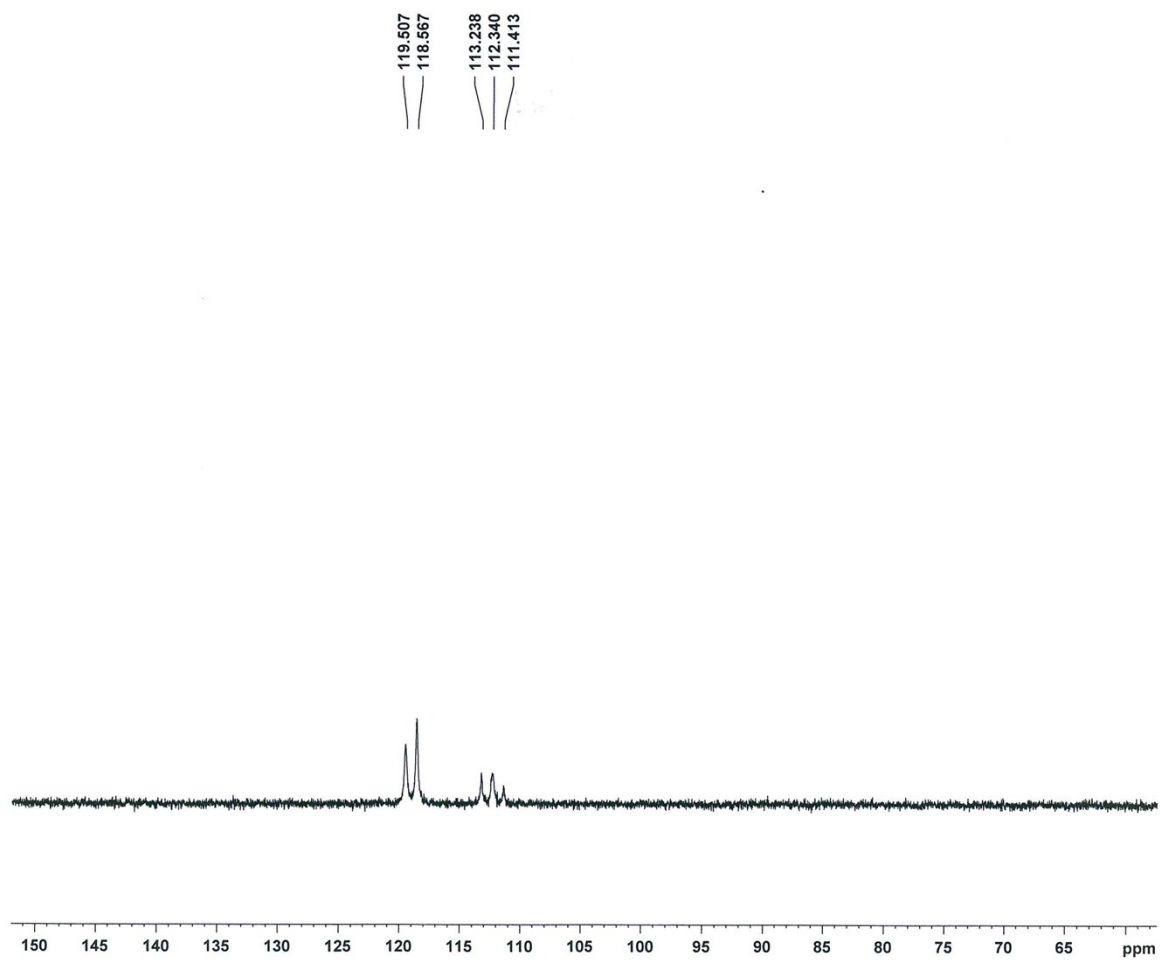

Figure S7.  $^1\text{H}$  NMR (162 MHz, 298 K,  $\text{CDCl}_3$ ) spectrum of **4**.

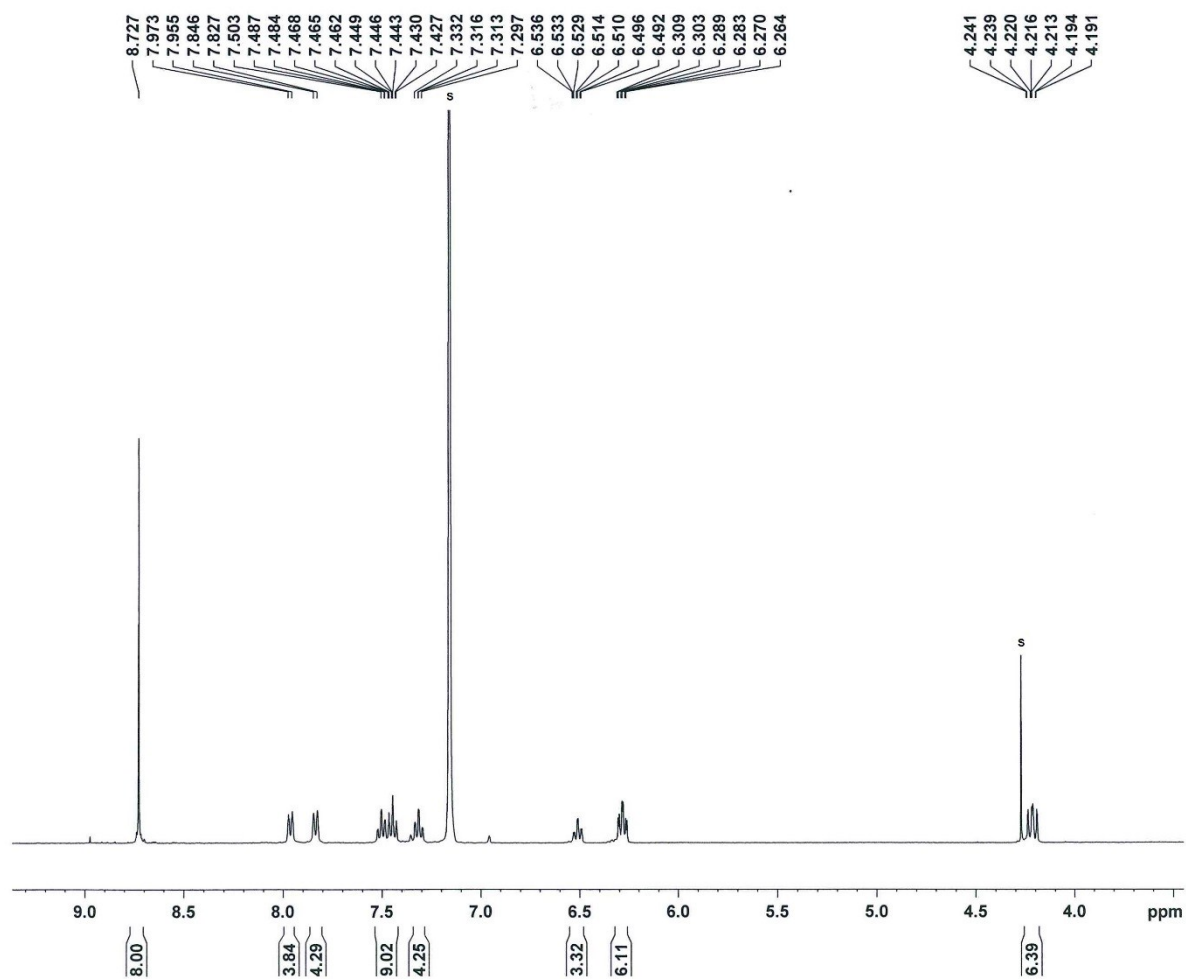

Figure S8.  $^1\text{H}$  NMR (400 MHz, 298 K,  $\text{C}_6\text{D}_6$ ) spectrum of **5** (X = impurity, S = residual solvent).

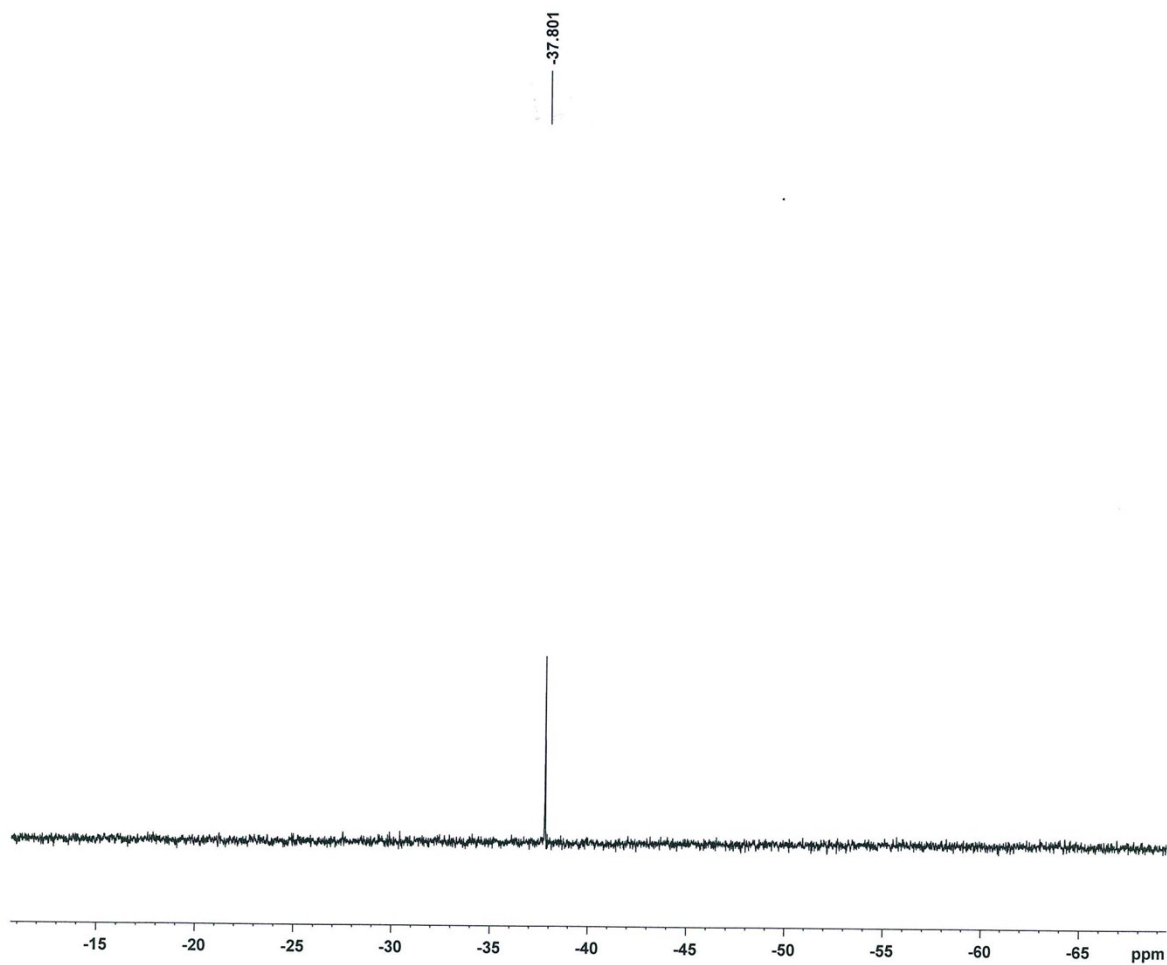

Figure S9.  $^{31}\text{P}\{^1\text{H}\}$  NMR (162 MHz, 298 K,  $\text{C}_6\text{D}_6$ ) spectrum of **5**.

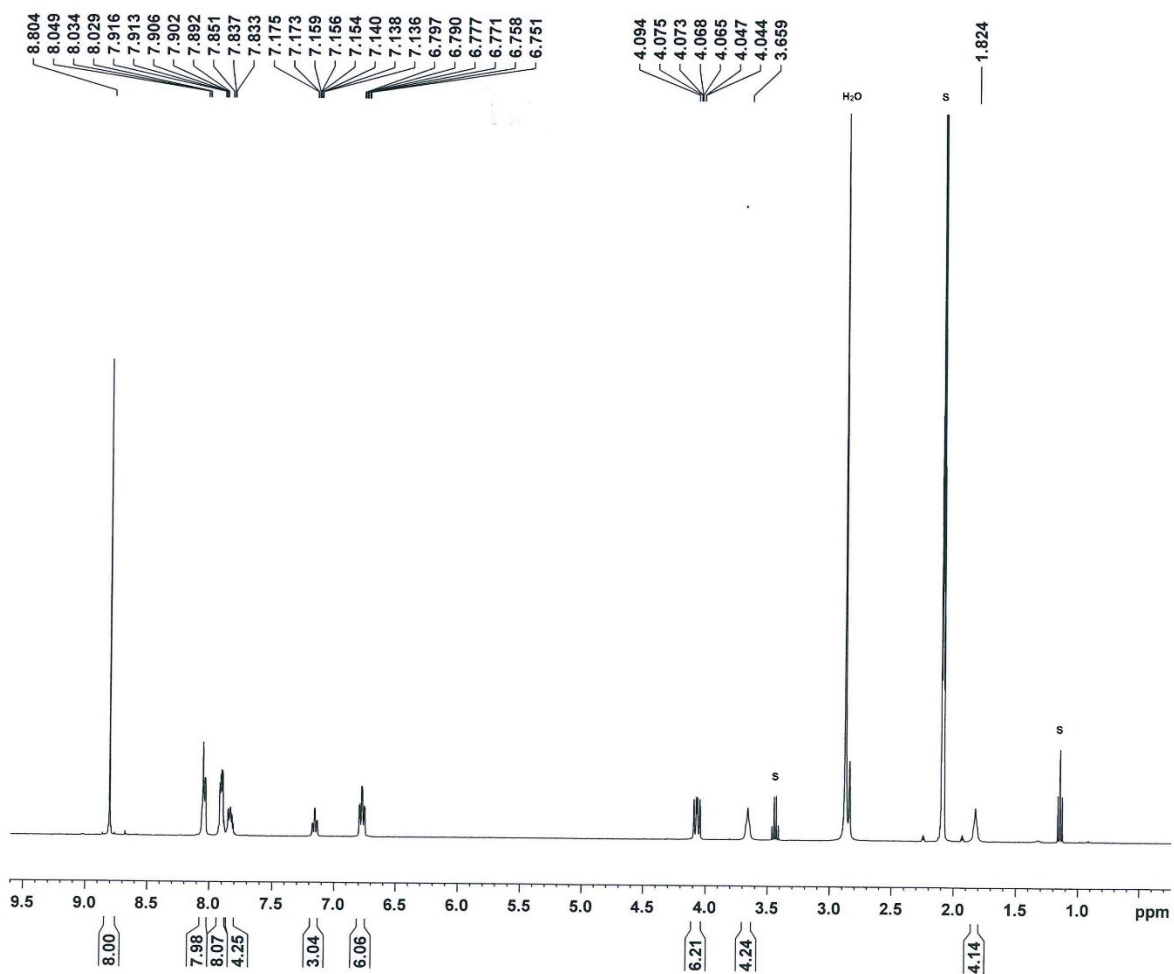

Figure S10.  $^1\text{H}$  NMR (400 MHz, 298 K, acetone- $d_6$ ) spectrum of **6** (X = impurity, S = residual solvent).

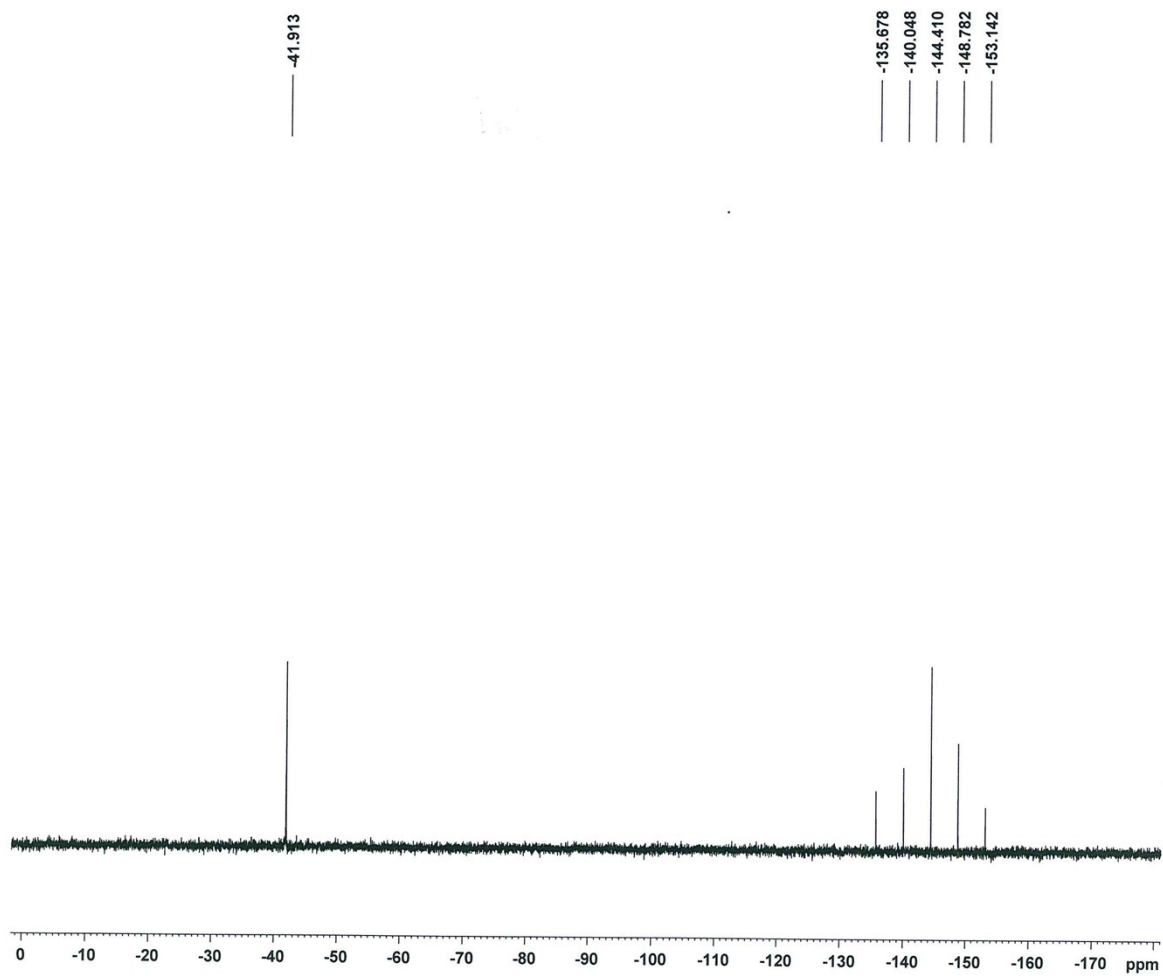

Figure S11.  $^{31}\text{P}\{^1\text{H}\}$  NMR (162 MHz, 298 K, acetone- $d_6$ ) spectrum of **6**.

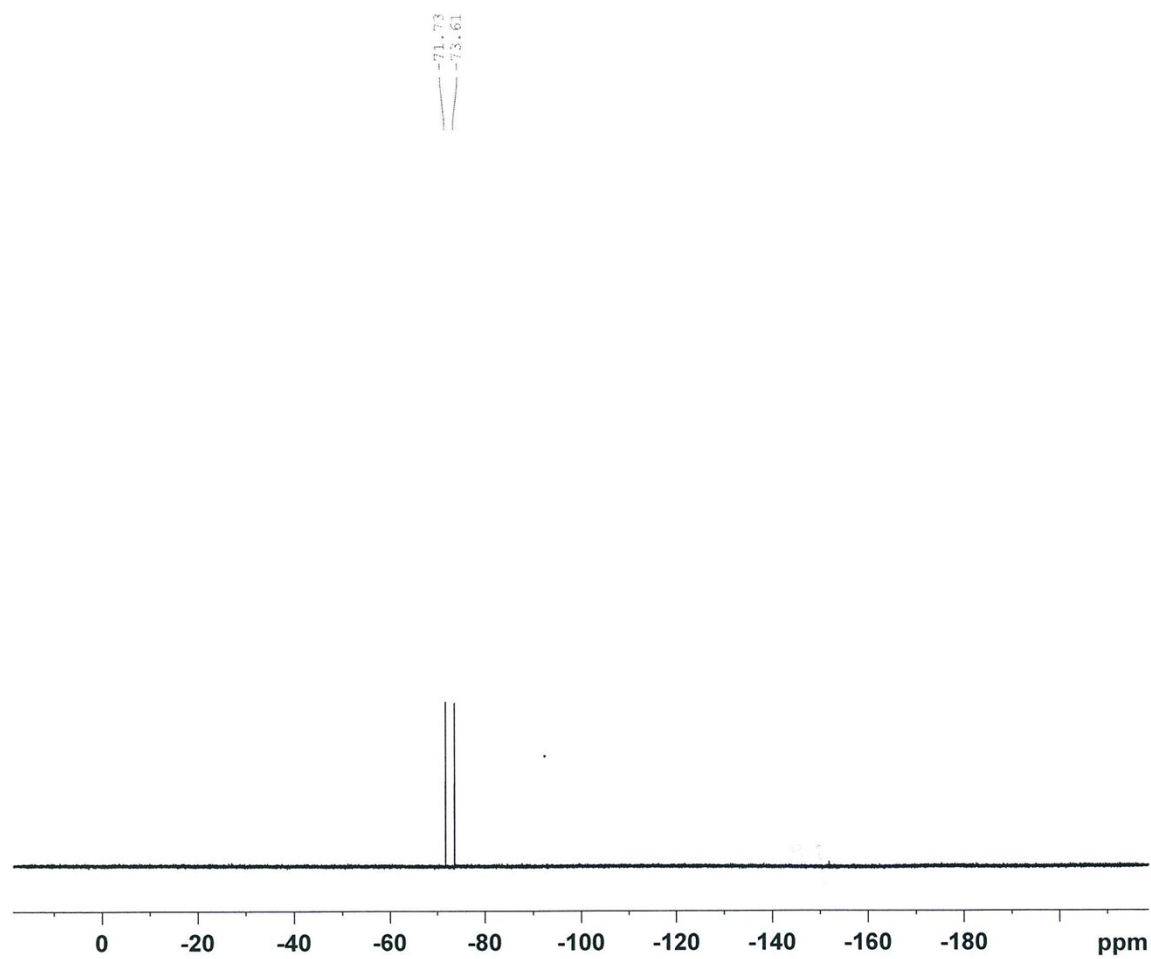

Figure S12.  $^{19}\text{F}\{^1\text{H}\}$  NMR (376.5 MHz, 298 K, acetone- $d_6$ ) spectrum of **6**.

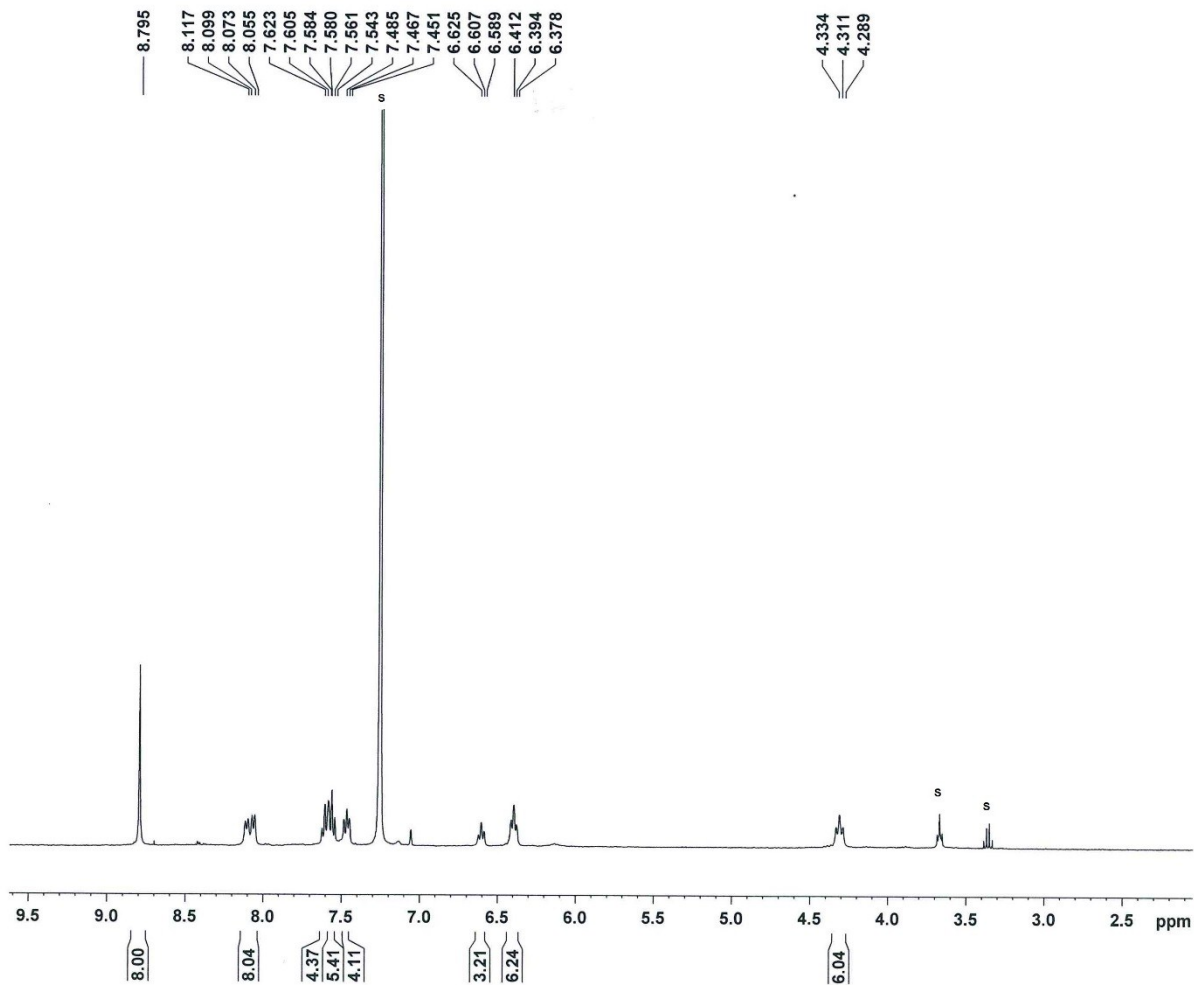

Figure S13.  $^1\text{H}$  NMR (400 MHz, 298 K,  $\text{C}_6\text{D}_6$ ) spectrum of **7** (X = impurity, S = residual solvent).

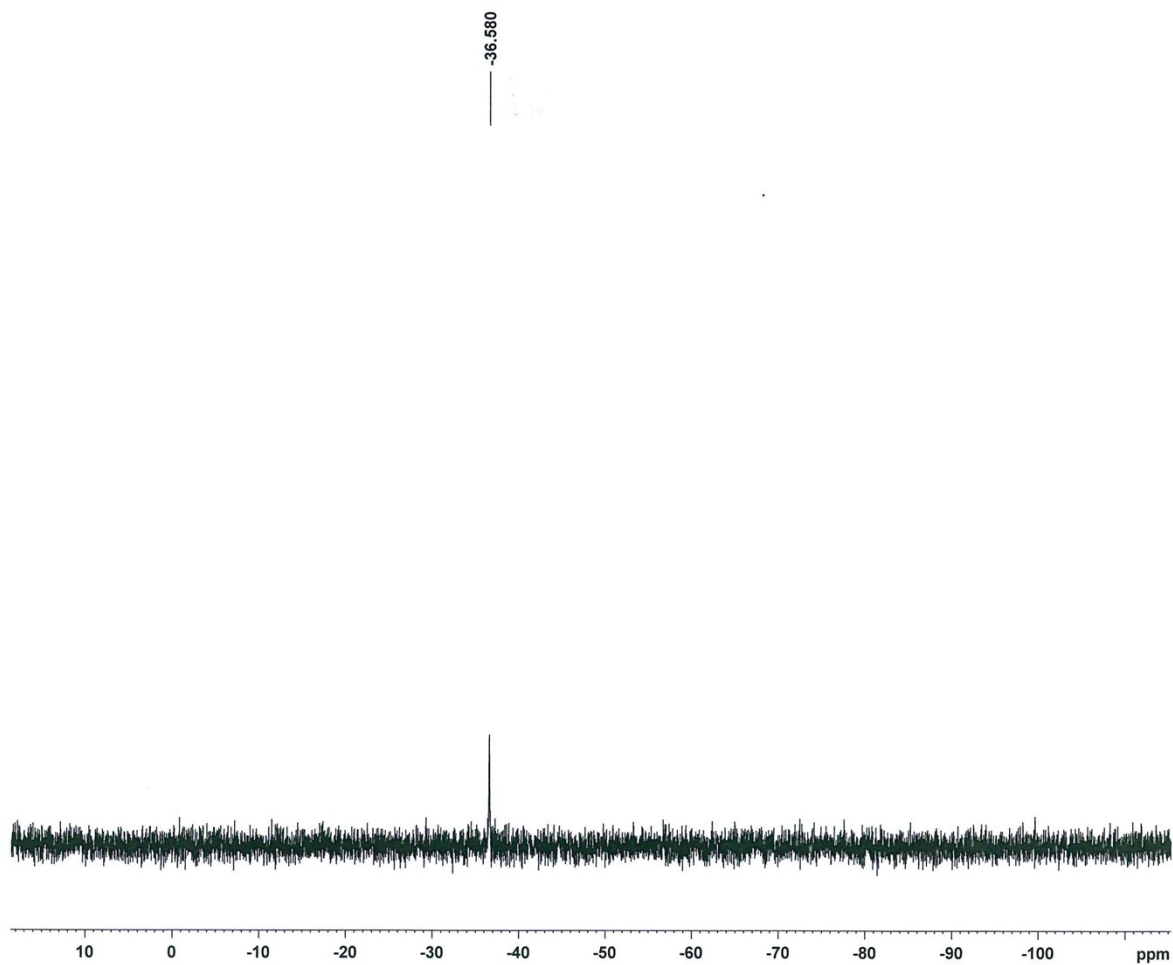

Figure S14.  $^{31}\text{P}\{^1\text{H}\}$  NMR (162 MHz, 298 K,  $\text{C}_6\text{D}_6$ ) spectrum of **7**.



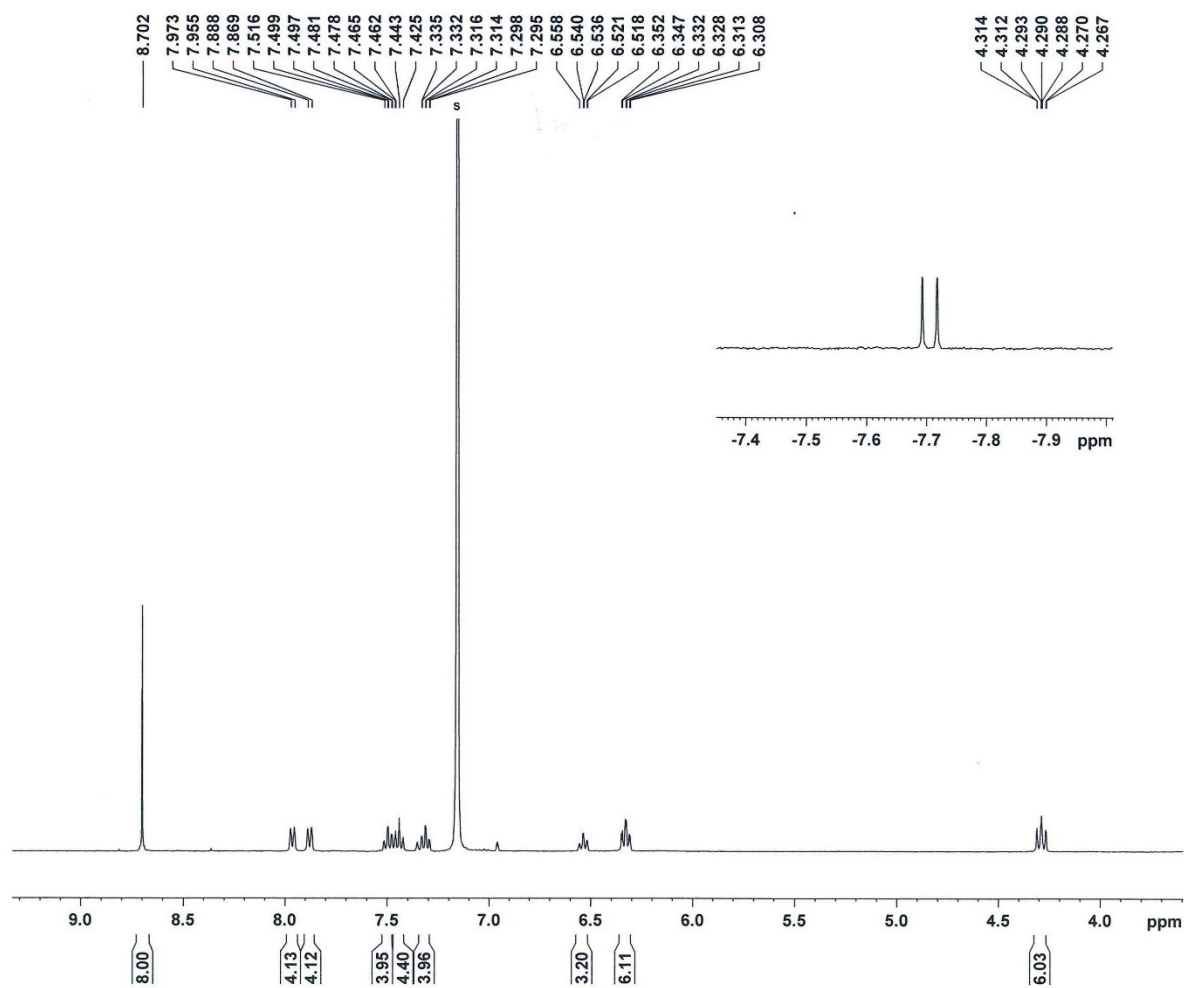

Figure S15.  $^1\text{H}$  NMR (400 MHz, 298 K,  $\text{C}_6\text{D}_6$ ) spectrum of **8** (X = impurity, S = residual solvent).

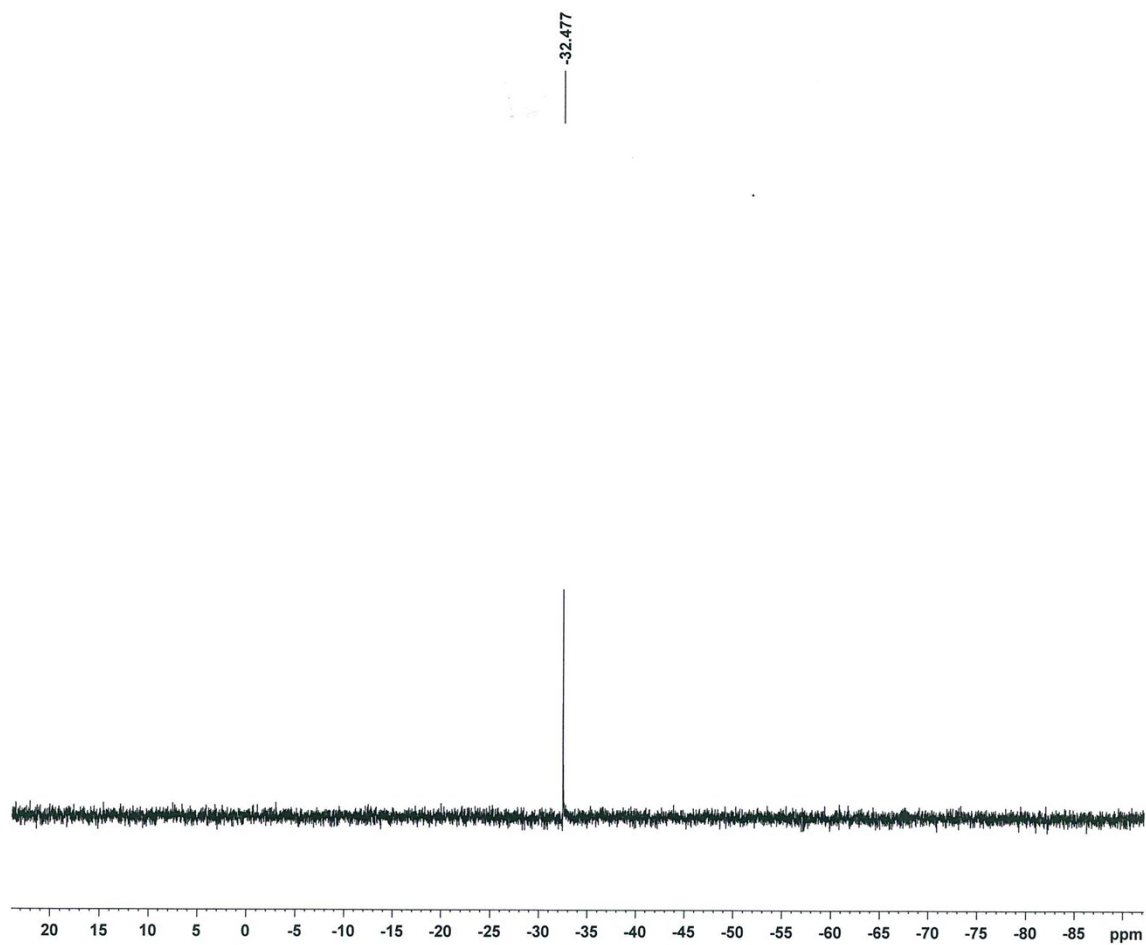

Figure S16.  $^{31}\text{P}\{^1\text{H}\}$  NMR (162 MHz, 298 K,  $\text{C}_6\text{D}_6$ ) spectrum of **8**.

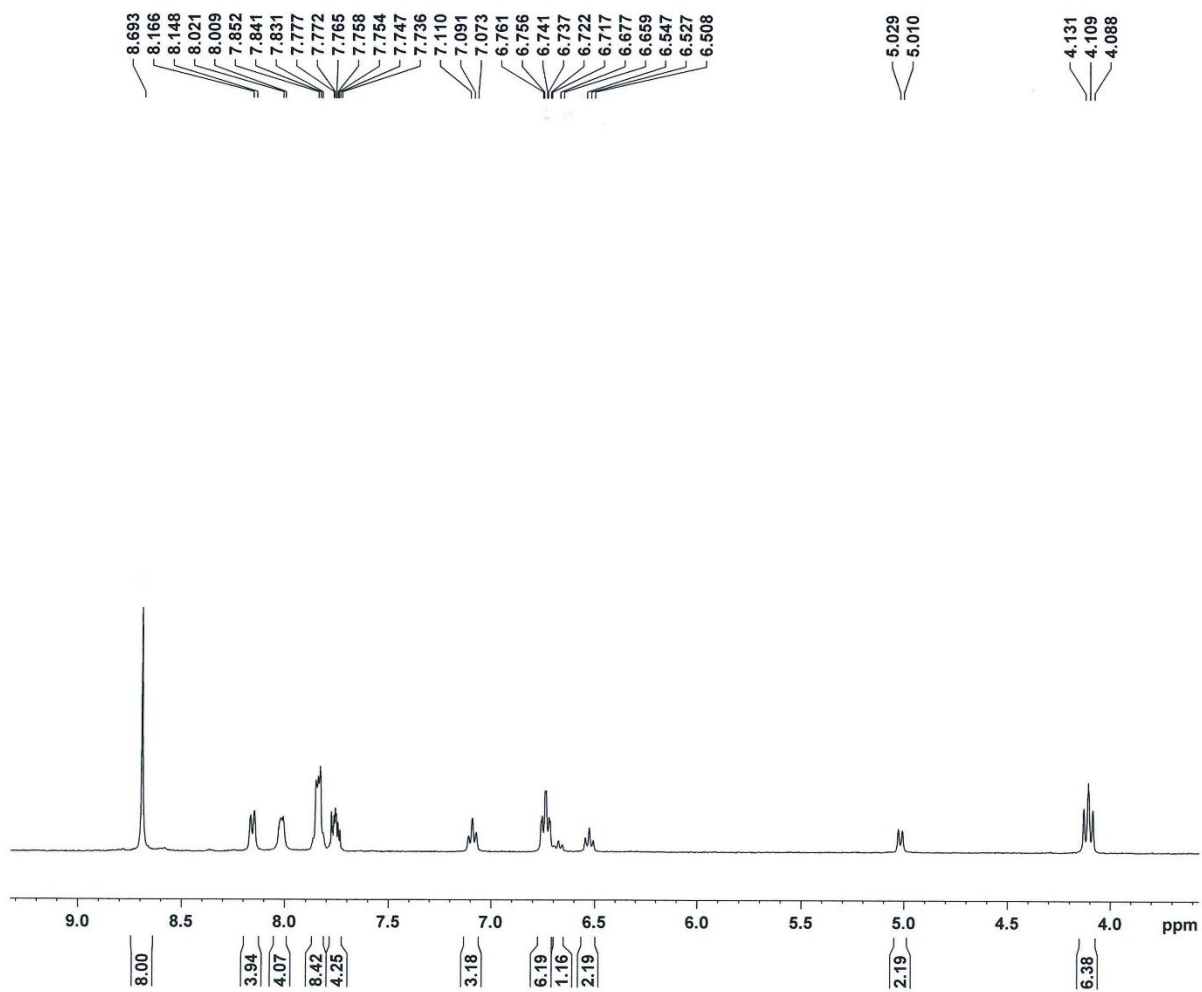

Figure S17.  $^1\text{H}$  NMR (400 MHz, 298 K, acetone- $d_6$ ) spectrum of **9** (X = impurity, S = residual solvent).

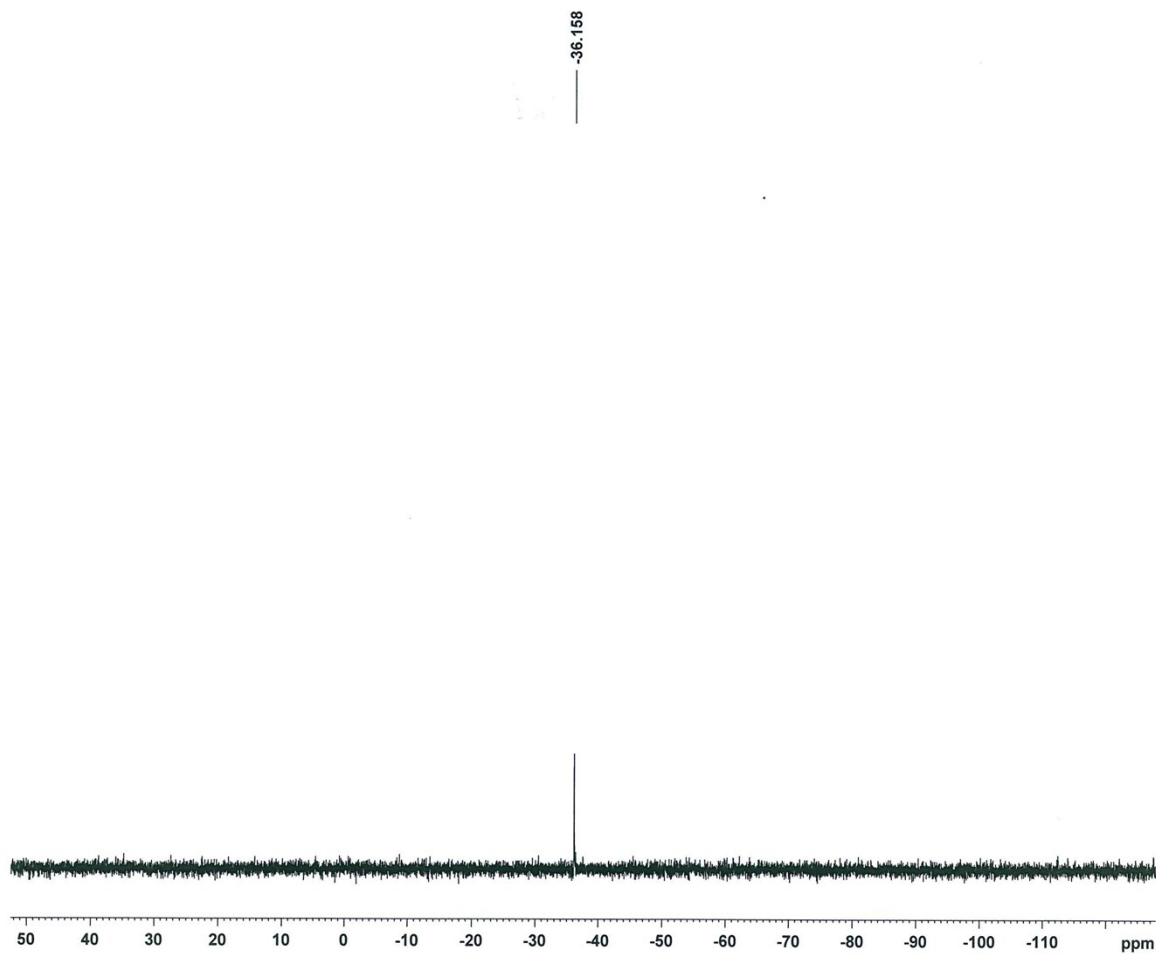

Figure S18.  $^{31}\text{P}\{^1\text{H}\}$  NMR (162 MHz, 298 K, acetone- $d_6$ ) spectrum of **9**.

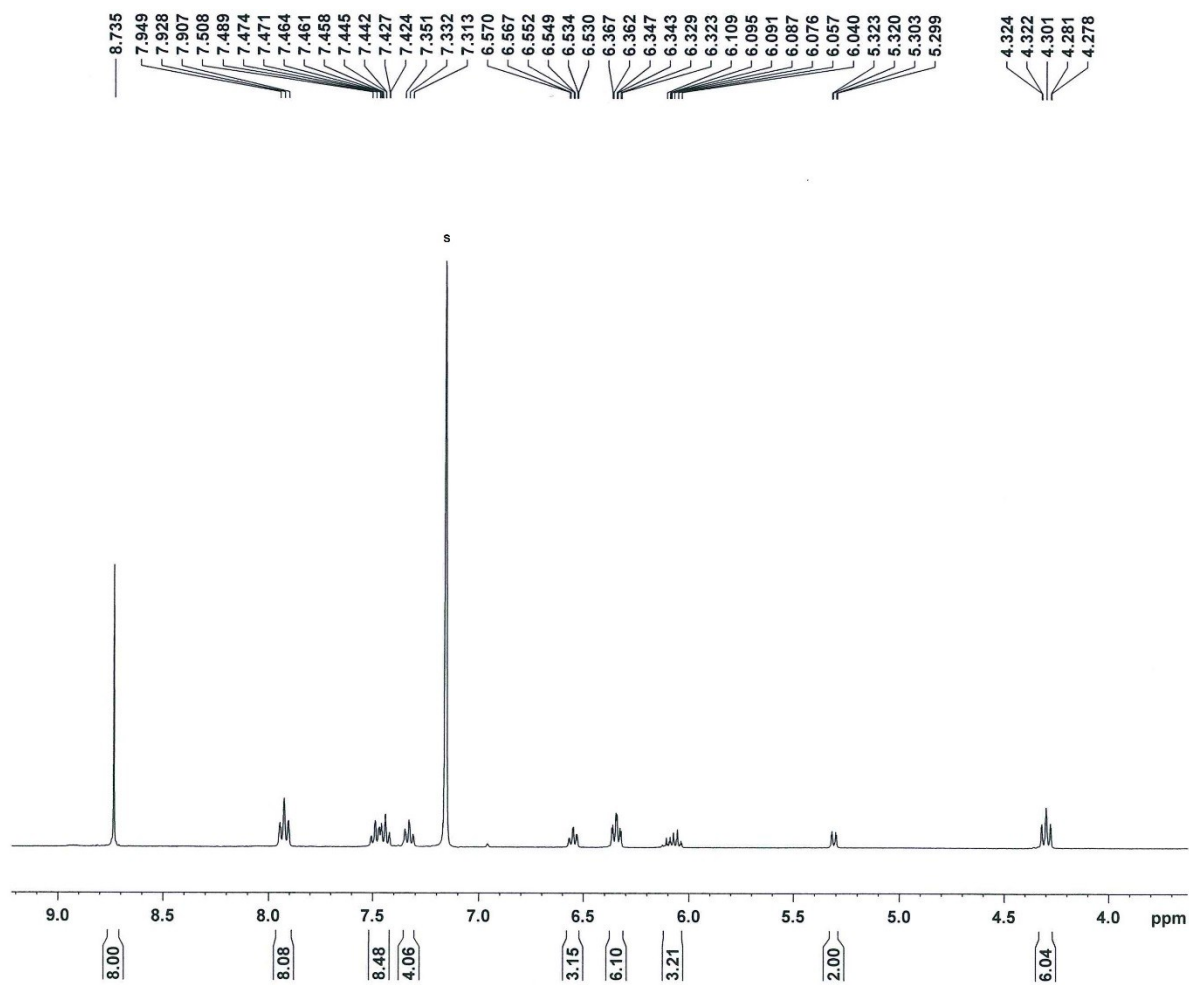

Figure S19.  $^1\text{H}$  NMR (400 MHz, 298 K,  $\text{C}_6\text{D}_6$ ) spectrum of **10** (X = impurity, S = residual solvent).

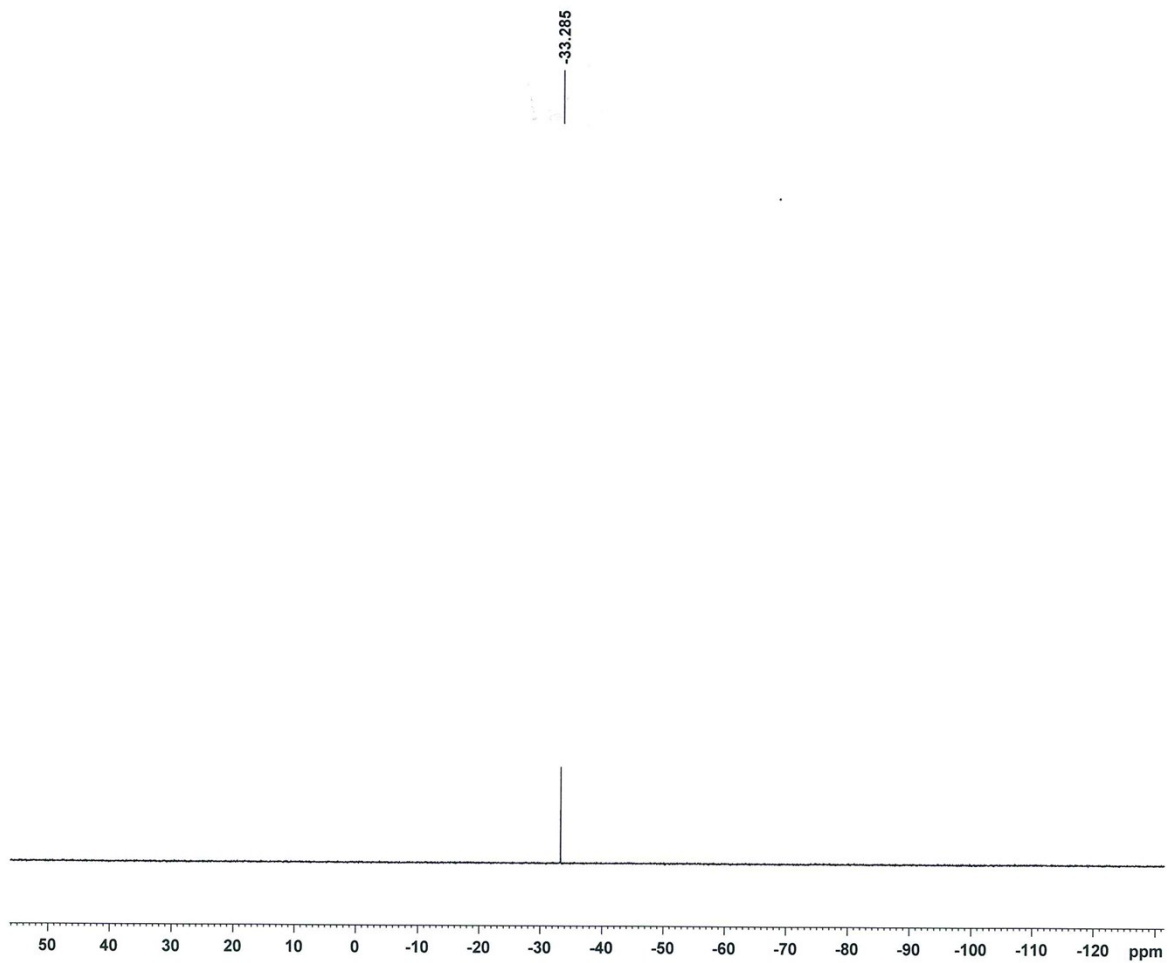

Figure S20.  $^{31}\text{P}\{^1\text{H}\}$  NMR (162 MHz, 298 K,  $\text{C}_6\text{D}_6$ ) spectrum of **10**.

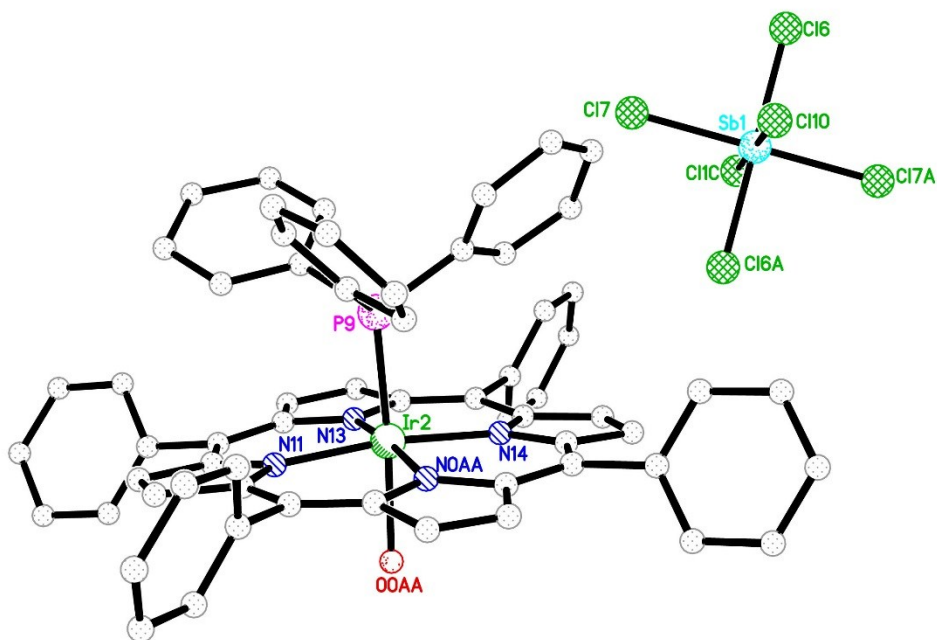

Figure S25. Preliminary molecular structure of  $[\text{Ir}(\text{tpp})(\text{PPh}_3)(\text{H}_2\text{O})](\text{SbCl}_6)$ .

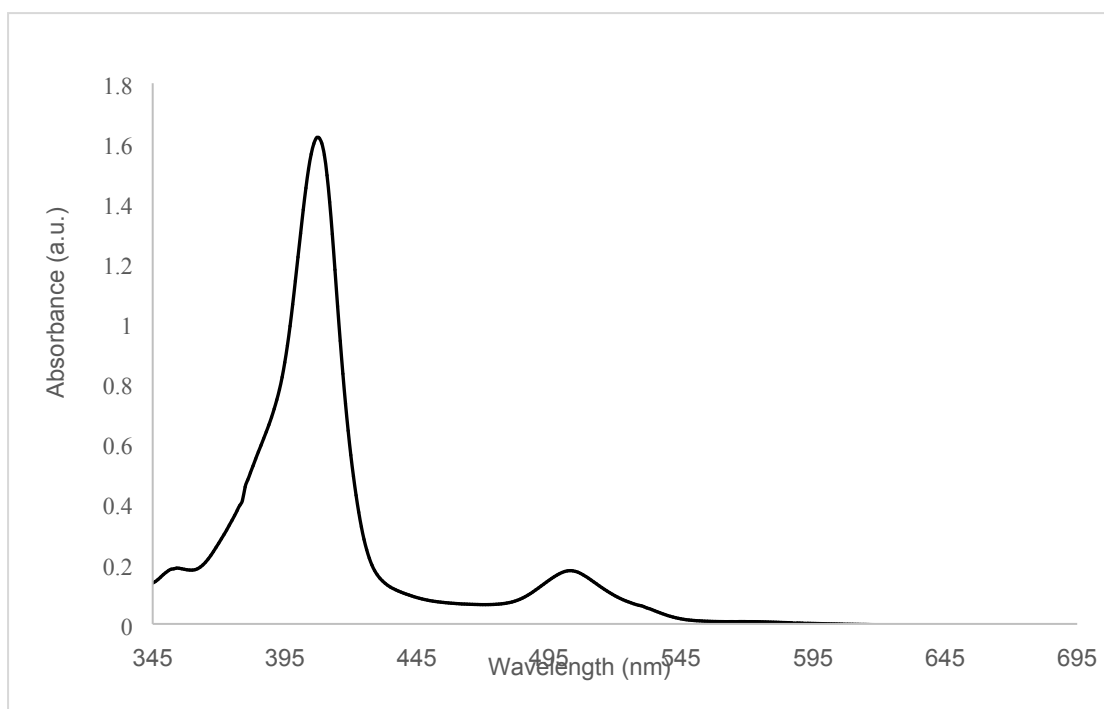

Figure S26. UV/vis spectrum of  $[\text{Ir}(\text{tpp})\text{R}]$  ( $\text{R} = \text{C}_8\text{H}_{13}$ ) (**1**) in  $\text{CH}_2\text{Cl}_2$  at room temperature.

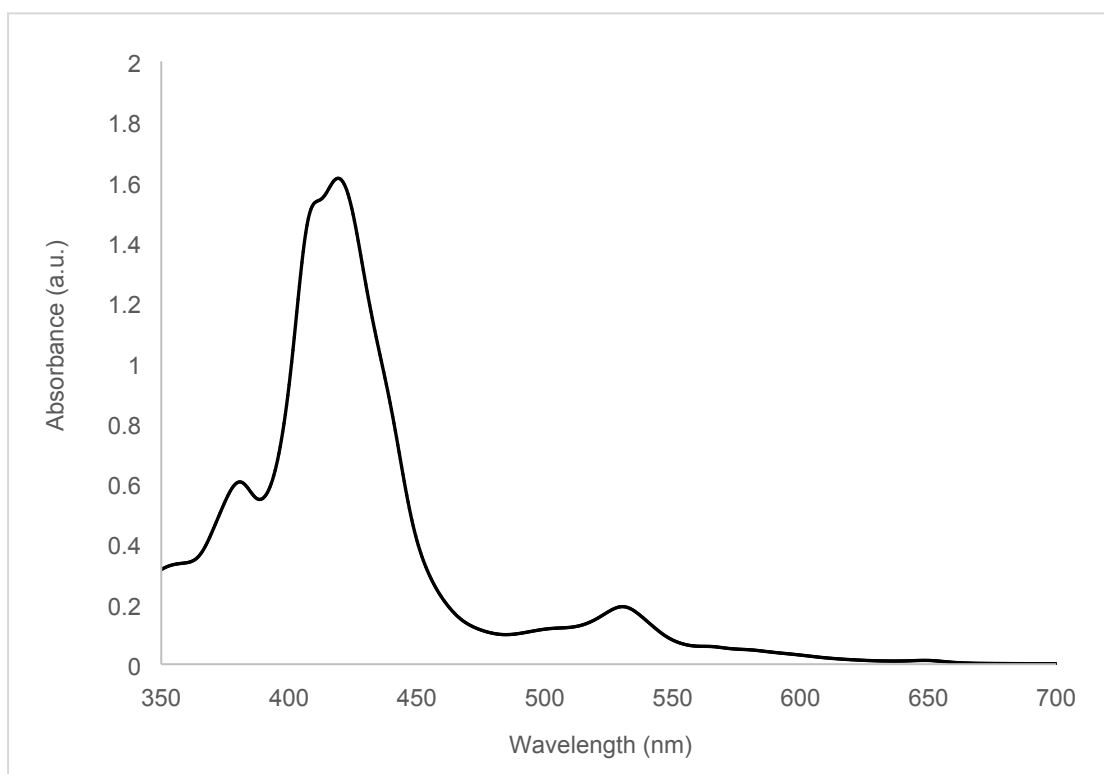

Figure S27. UV/vis spectrum of  $[\text{Ir}(\text{tpp})(\text{C}_8\text{H}_{13})(\text{PPh}_3)]$  (**2**) in  $\text{CH}_2\text{Cl}_2$  at room temperature.



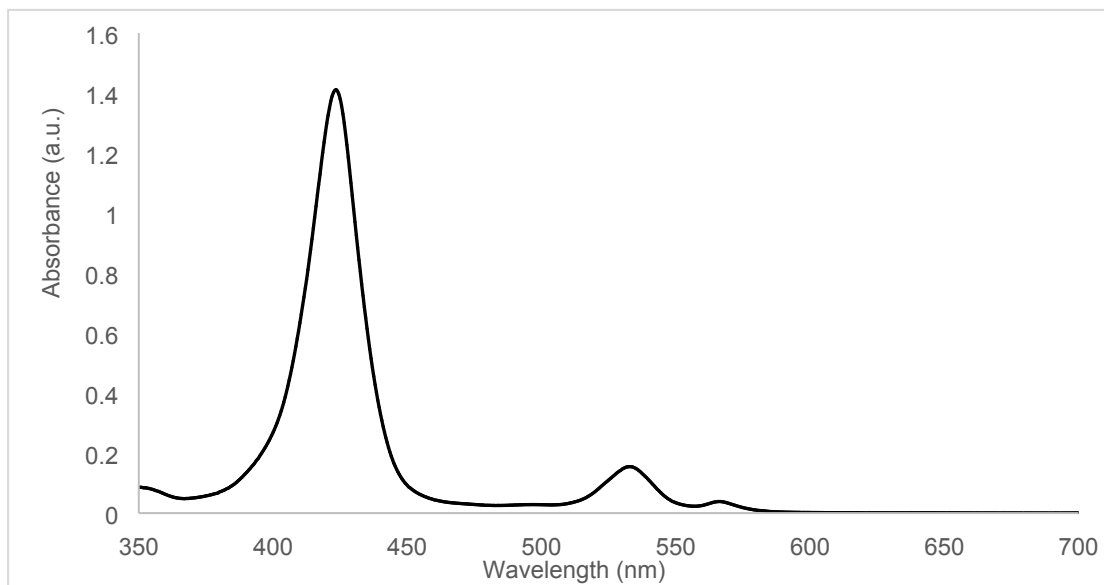

Figure S28. UV/vis spectrum of [Ir(tpp)(PPh<sub>3</sub>)Cl] (**5**) in CH<sub>2</sub>Cl<sub>2</sub> at room temperature.

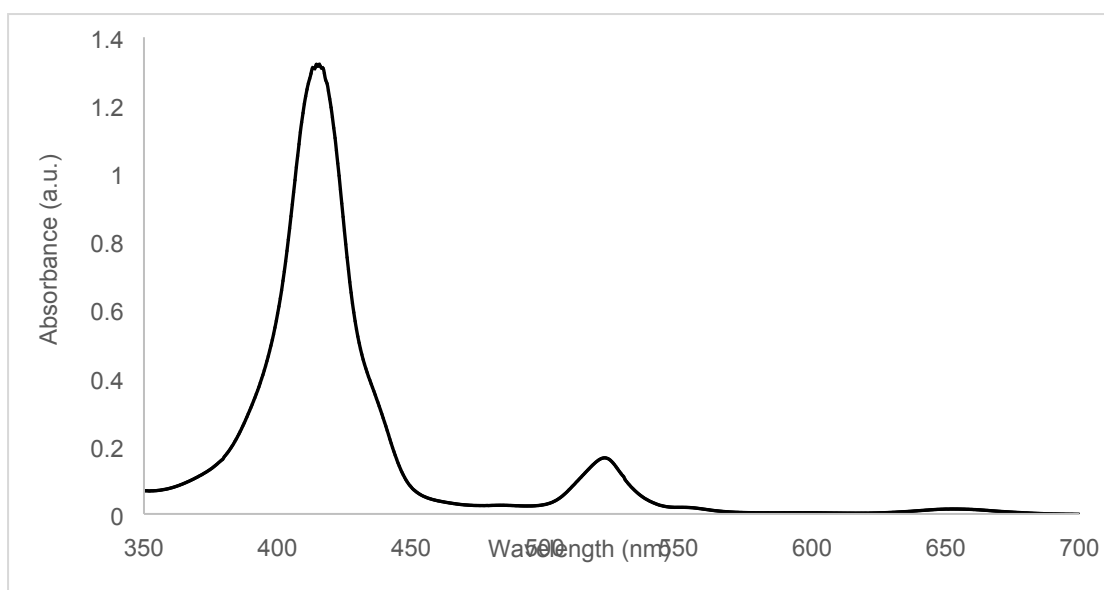

Figure S29. UV/vis spectrum of [Ir(tpp)(PPh<sub>3</sub>)(thf)](PF<sub>6</sub>) (**6**) in CH<sub>2</sub>Cl<sub>2</sub> at room temperature.

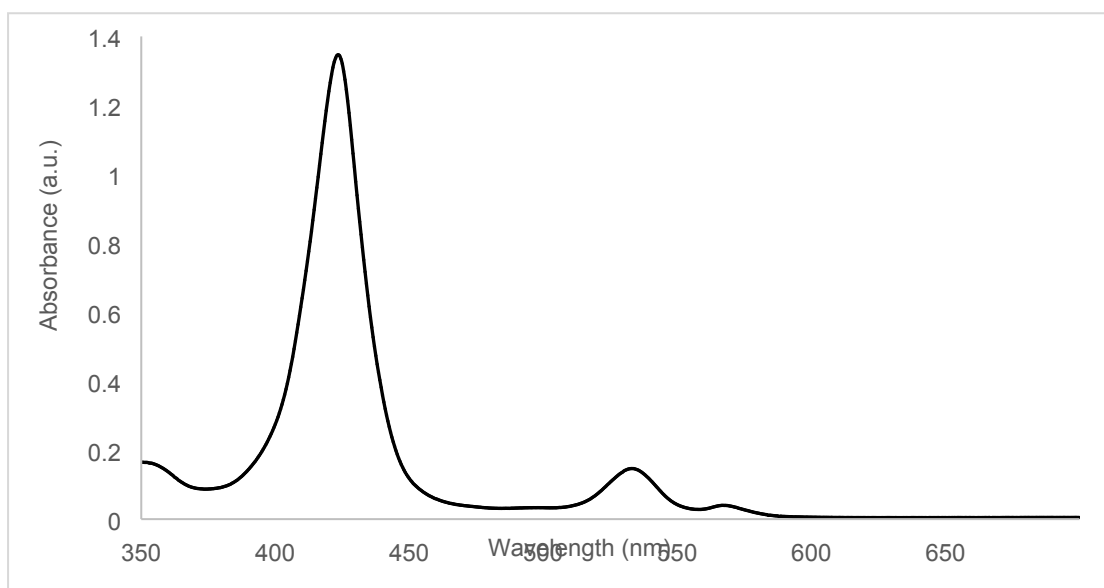

Figure S30. UV/Vis spectrum of [Ir(tpp)(PPh<sub>3</sub>)(OH)] (**7**) in CH<sub>2</sub>Cl<sub>2</sub> at room temperature.

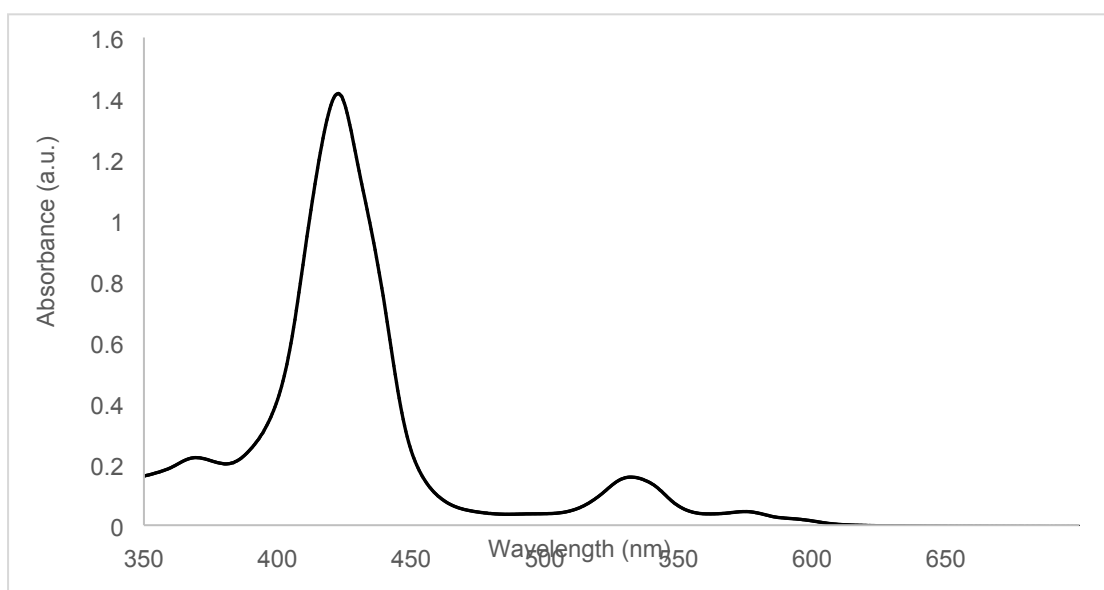

Figure S31. UV/Vis spectrum of [Ir(tpp)(PPh<sub>3</sub>)(SH)] (**8**) in CH<sub>2</sub>Cl<sub>2</sub> at room temperature.

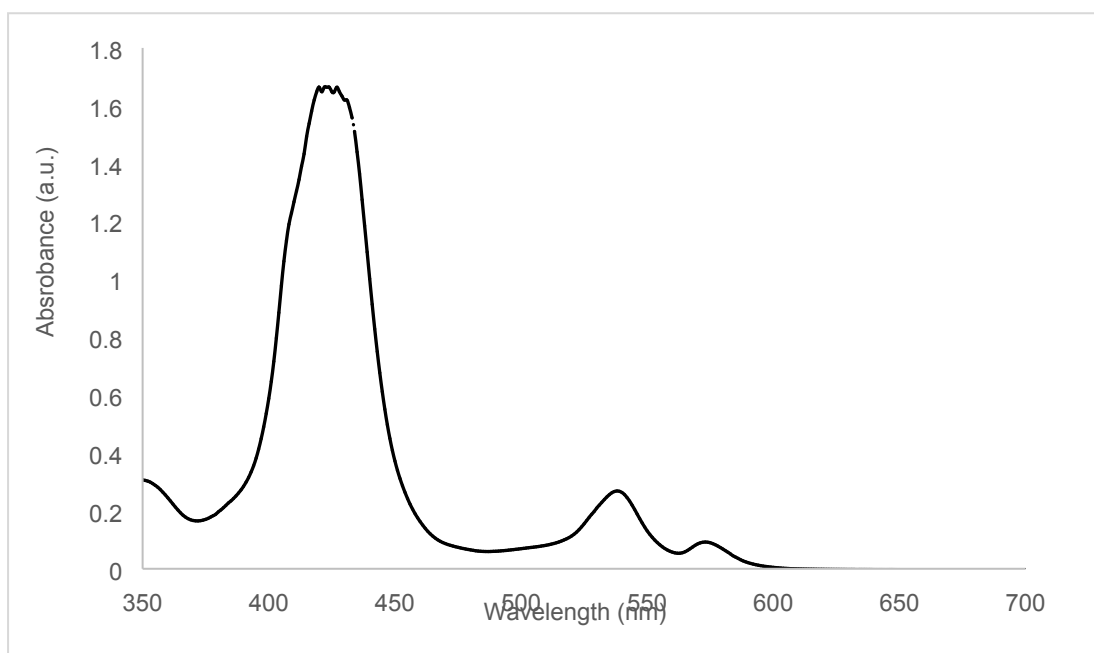

Figure S32. UV/Vis spectrum of  $[\text{Ir}(\text{tpp})(\text{PPh}_3)(\mu\text{-}\eta^1\text{:}\eta^1\text{-C}\equiv\text{CPh})(\text{CuI})]$  (**9**) in  $\text{CH}_2\text{Cl}_2$  at room temperature.

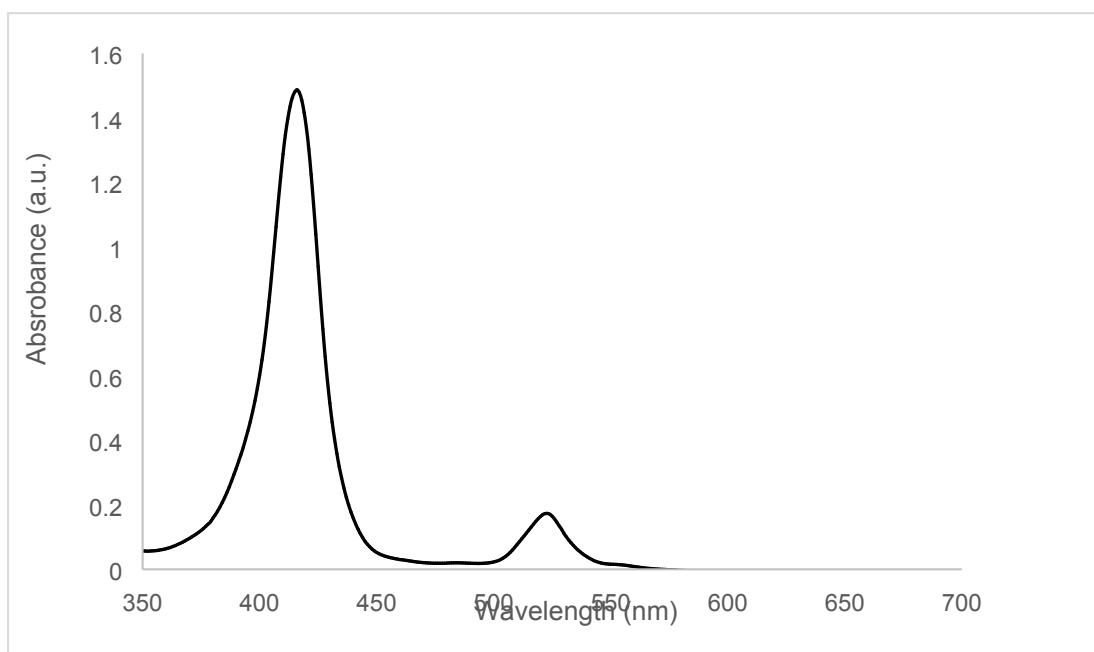

Figure S33. UV/Vis spectrum of  $[\text{Ir}(\text{tpp})(\text{PPh}_3)(\text{C}\equiv\text{CPh})]$  (**10**) in  $\text{CH}_2\text{Cl}_2$  at room temperature.

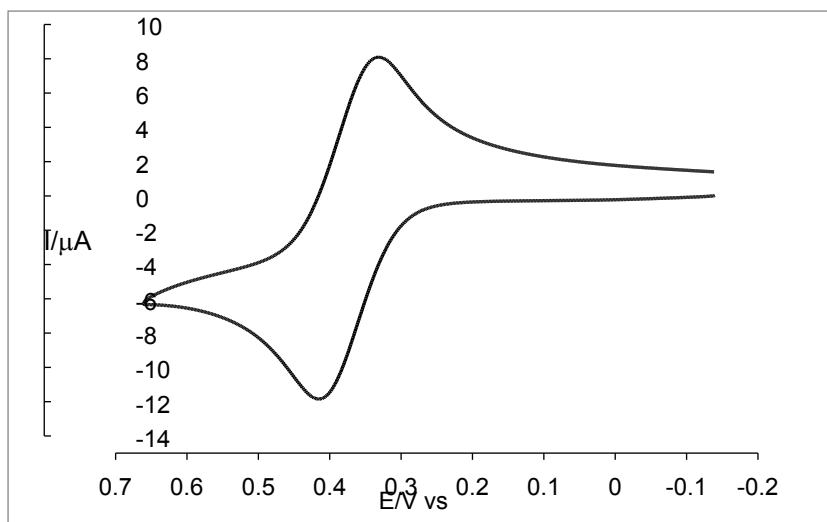

Figure S34. CV of  $[\text{Ir}(\text{tpp})\text{R}]$  ( $\text{R} = \text{C}_8\text{H}_{13}$ ) (**1**); measured at a glassy carbon electrode in  $\text{CH}_2\text{Cl}_2$ , supporting electrolyte: 0.2 M of  $[\text{nBu}_4\text{N}][\text{PF}_6]$ , scan rate =  $100 \text{ mVs}^{-1}$ .

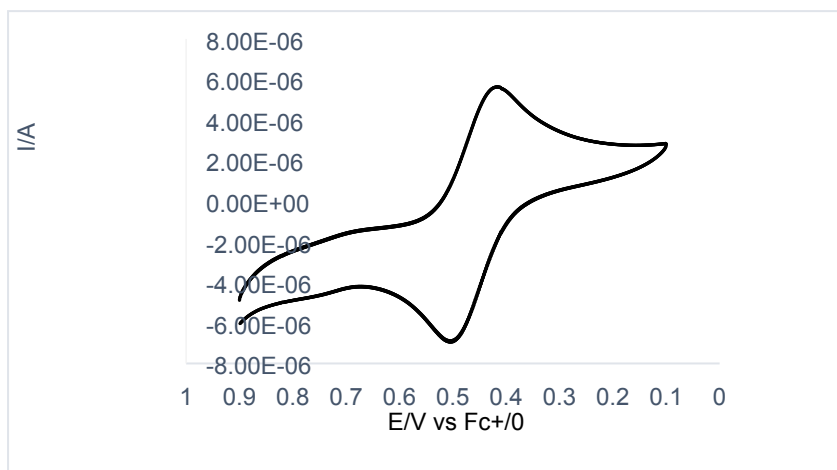

Figure S35. CV of  $[\text{Ir}(\text{tpp})\text{R}(\text{PPh}_3)]$  ( $\text{R} = \text{C}_8\text{H}_{13}$ ) (**2**); measured at a glassy carbon electrode in  $\text{CH}_2\text{Cl}_2$ , supporting electrolyte: 0.2 M of  $[\text{nBu}_4\text{N}][\text{PF}_6]$ , scan rate =  $100 \text{ mVs}^{-1}$ .

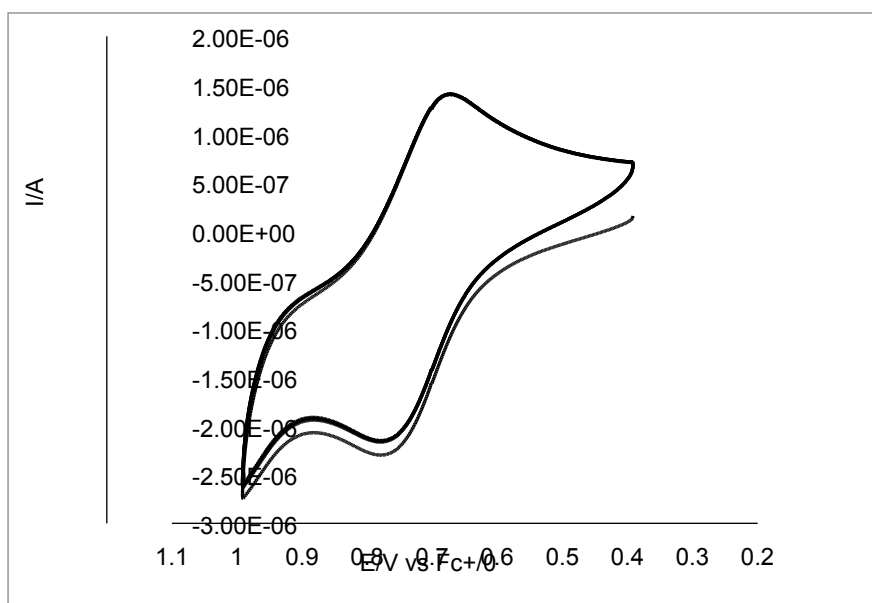

Figure S36. CV of  $[\text{Ir}(\text{tpp})(\text{PPh}_3)\text{Cl}]$  (**5**); measured at a glassy carbon electrode in  $\text{CH}_2\text{Cl}_2$ , supporting electrolyte: 0.2 M of  $[\text{nBu}_4\text{N}][\text{PF}_6]$ , scan rate =  $100 \text{ mVs}^{-1}$ .

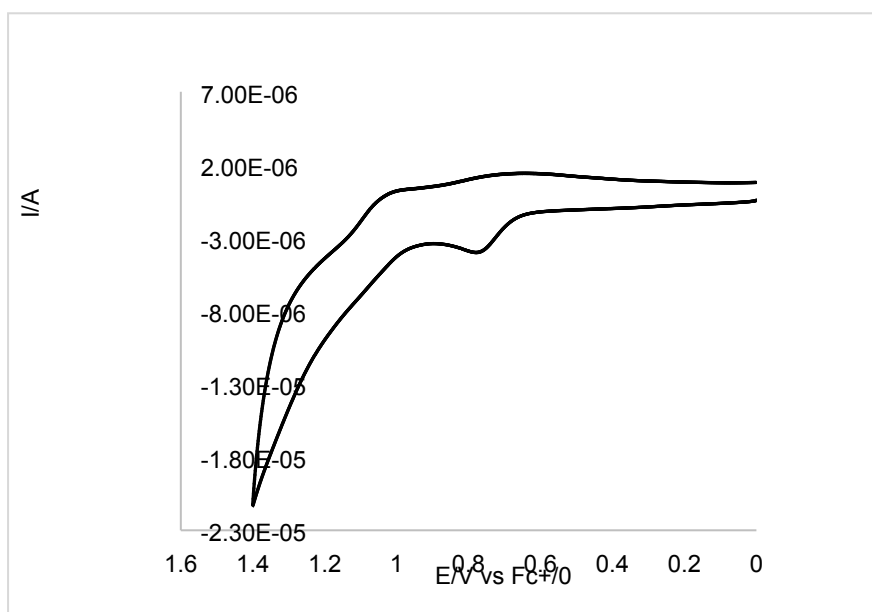

Figure S37. CV of  $[\text{Ir}(\text{tpp})(\text{PPh}_3)(\text{OH})]$  (**7**); measured at a glassy carbon electrode in  $\text{CH}_2\text{Cl}_2$ , supporting electrolyte: 0.2 M of  $[\text{nBu}_4\text{N}][\text{PF}_6]$ , scan rate =  $100 \text{ mVs}^{-1}$ .

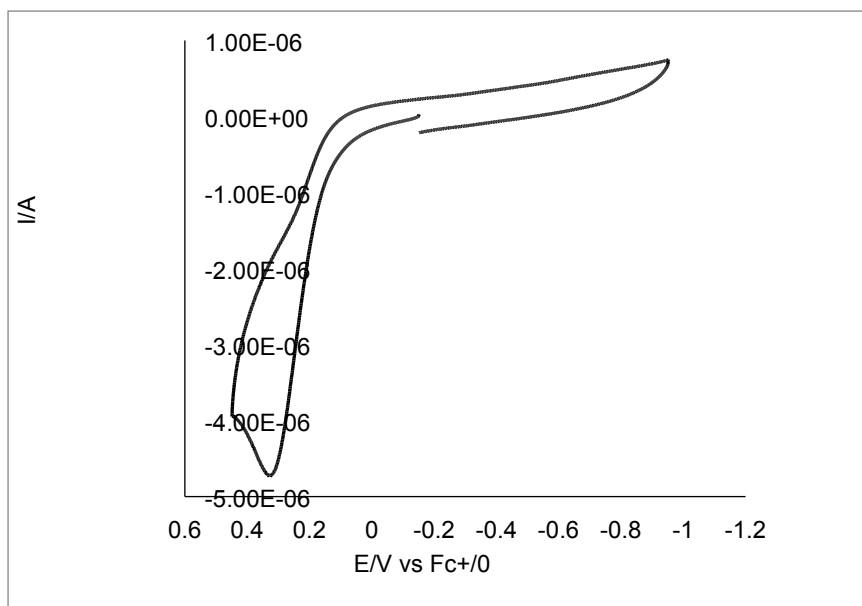

Figure S38. CV of  $[\text{Ir}(\text{tpp})(\text{PPh}_3)(\text{SH})]$  (**8**); measured at a glassy carbon electrode in  $\text{CH}_2\text{Cl}_2$ , supporting electrolyte: 0.2 M of  $[\text{nBu}_4\text{N}][\text{PF}_6]$ , scan rate =  $100 \text{ mVs}^{-1}$ .

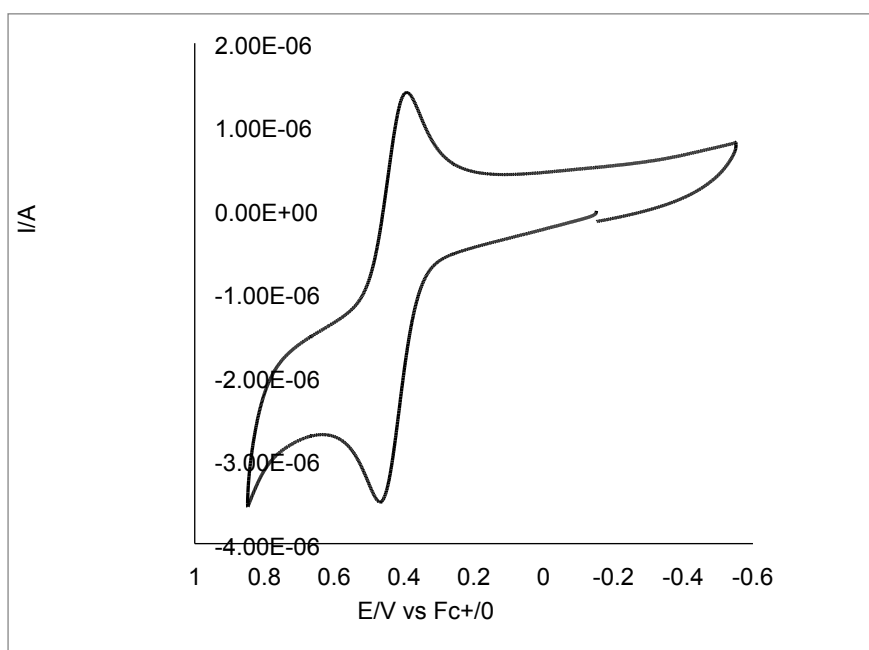

Figure S39. CV of  $[\text{Ir}(\text{tpp})(\text{PPh}_3)(\text{C}\equiv\text{CPh})]$  (**10**); measured at a glassy carbon electrode in  $\text{CH}_2\text{Cl}_2$ , supporting electrolyte: 0.2 M of  $[\text{nBu}_4\text{N}][\text{PF}_6]$ , scan rate =  $100 \text{ mVs}^{-1}$ .
